# Supplementary material for: Biogenesis of Pro-senescent Microparticles by Endothelial Colony Forming Cells from Premature Neonates is driven by SIRT1-Dependent Epigenetic Regulation of MKK6
Source: PubMed Central journal article supplement (PMC5557933; doi:10.1038/s41598-017-08883-1), 2017-08-15
Supplement: 41598_2017_8883_MOESM1_ESM.pdf [file 41598_2017_8883_MOESM1_ESM.pdf]

1 **SUPPLEMENTAL MATERIAL**

2  
3 **Biogenesis of Pro-senescent Microparticles by Endothelial Colony Forming Cells from**  
4 **Premature Neonates is driven by SIRT1-Dependent Epigenetic Regulation of MKK6**

5  
6 Stéphanie Simoncini<sup>1,§</sup>, Anne-Line Chateau<sup>1,6,§</sup>, Stéphane Robert<sup>1</sup>, Dilyana Todorova<sup>1</sup>,  
7 Catherine Yzydorzick<sup>2</sup>, Romaric Lacroix<sup>1</sup>, Isabelle Ligi<sup>3</sup>, Laurence Louis<sup>4</sup>, Richard Bachelier<sup>1</sup>,  
8 Umberto Simeoni<sup>2</sup>, Frédérique Magdinier<sup>4</sup>, Françoise Dignat-George<sup>1,5</sup> and Florence  
9 Sabatier<sup>1,6</sup>

10  
11 <sup>1</sup>Aix Marseille Univ, INSERM, VRCM, Marseille, France; <sup>2</sup>Service de pédiatrie, Université de  
12 Lausanne, CHUV, 1011, Lausanne, Suisse; <sup>3</sup>APHM, CHU de la Conception, Département de  
13 Néonatalogie, Marseille, France; <sup>4</sup>Aix Marseille Univ, INSERM, GMGF, Marseille, France;  
14 <sup>5</sup>APHM, CHU de la Conception, Service d'hématologie, Marseille, France; <sup>6</sup>APHM, CHU de  
15 la Conception, Laboratoire de culture et thérapie cellulaire, INSERM, CBT-1409, Marseille,  
16 France. <sup>§</sup>The authors contributed equally to this work.

17  
18  
19 **Address correspondence to:**

20 Pr. F. Dignat-George  
21 VRCM, INSERM UMR\_S 1076,  
22 Faculté de Pharmacie  
23 27 Bd Jean Moulin 13385  
24 Marseille cedex 05 France.  
25 Tel: 33 4 918 356 86  
26 Fax: 33 4 918 356 02  
27 Email: francoise.dignat-george@univ-amu.fr

28

29

30

## 31 **Expanded Materials and Methods**

### 32 **Patients**

33 Eighteen term (control, gestational age (GA) > 37 weeks, appropriate weight) and twenty-  
34 nine preterm neonates (GA 24 to 35 weeks with appropriate or small weight for GA), were  
35 included. Exclusion criteria were congenital viral infections, major congenital heart or  
36 structural brain malformations, genetic abnormalities and metabolic diseases. This research  
37 was approved by a local ethic committee Assistance Publique Hôpitaux de Marseille and the  
38 study was performed conform the declaration of Helsinki. All the parents have provided  
39 written informed consent for the use of cord blood. The patient characteristics are shown in  
40 **Table S1**.

### 41 **Isolation of endothelial colony-forming cells.**

42 ECFC were isolated and expanded from mononuclear cell fraction (MNC) obtained from the  
43 cord blood of term (CT) and preterm (PT) neonates, cultured and characterized as previously  
44 described<sup>1</sup>. ECFC were used between the third and fourth passage.

### 45 **Antibody arrays**

46 Conditioned media for antibody array analysis were prepared by washing cells with PBS and  
47 incubating them in basal medium for 48h. The conditioned media were collected in a  
48 centrifuge tube, and the cells remaining on the dish were counted to normalize conditioned  
49 media volumes by cell number. The conditioned media were clarified by brief centrifugation,  
50 0.2µm filtered, diluted with a serum-free medium to a concentration equivalent to  $1.35 \times 10^5$   
51 cells per 1.3ml, and applied to the antibody arrays (Raybiotech; AAH-CYT-1) as described  
52 previously by Freund et al<sup>2</sup> and as recommended by the supplier. The signals were detected  
53 using a G-BOX Imaging System (GeneSys) and were analyzed using specific software  
54 (GeneTools, Syngene). Signals were averaged and displayed as described in the figure  
55 legend.

### 56 **ELISA**

57 Conditioned media were prepared by incubating cells for 48h as described above. The CM  
58 were analyzed using the Human IL-6 ELISA Kit II and reagents, following the procedures  
59 described by the manufacturer (BD OptEIA™; 550799).

### 60 **Counting and measuring particles.**

61 i. **Tunable resistive pulse sensing.** The concentration and size distribution of particles  
62 was analyzed with TRPS (qNano, Izon Science Ltd, Christchurch, New Zealand), a  
63 relatively new technology that allows the detection of particles passing through a  
64 nanopore by way of single-electrophoresis<sup>3</sup>. The technology is based on the Coulter  
65 principle at the nano scale and operates by detecting transient changes in the ionic  
66 current generated by the transport of the target particles through a size-tunable  
67 nanopore in a polyurethane membrane. Samples were diluted to half in PBS buffer in  
68 a small sterile tube and analyzed using both an NP150 (size range 50 to 250nm) and  
69 NP400 (size range 200 to 1000nm) nanopore at a 45mm stretch. Calibration was  
70 performed using CPC200 OR SKP400 calibration particles (Izon) as a standard

71 according to the manufacturer's instructions. Data were recorded and analyzed using  
72 the Izon Control Suite software version 3.2.2.234

73 ii. **Flow cytometric analysis of EMP.** EMP were analyzed using a Gallios flow  
74 cytometer, as previously described by Robert et al<sup>4</sup>. Briefly, conditioned medium was  
75 collected after 48 hours of ECFC culture (passage 3 to 4) in 0.22µm filtered complete  
76 medium. After two initial centrifugation to discard debris (300 x g, 5 minutes) and  
77 apoptotic bodies (2000 x g, 15 minutes), EMP in resulting supernatant were  
78 quantified. The EMP labeling was based on a 30min incubation of 30µl of supernatant  
79 with Annexin A5-FITC (AnnV-FITC, Tau Technology BV, Netherlands). Thereafter,  
80 500µl of calcium buffer was added to improve the binding of Annexin A5 to  
81 phosphatidylserine. Then, 30µl of CytoCount beads (Cyto-Count, Dako, Copenhagen,  
82 Denmark) were added as internal standard to samples before FC analysis to  
83 determine the concentration of EMP. EMP concentrations (EMP/µl) were calculated  
84 by the following formula: (Number of events AnnexinV x Total amount of flow count  
85 beads)/ Number of acquired beads. The samples analyses were performed with the  
86 Kaluza® Analysis software (Beckman Coulter), as already described<sup>5,6</sup>.

#### 87 **Transfection.**

88 PT-ECFC were transfected with the pCMV-Sport6 expression vector (Empty) or the pCMV-  
89 Sport6-SIRT1 plasmid (NIH\_MGC\_91 clone) using the jetPEI<sup>TM</sup>-HUVEC *in vitro* DNA  
90 transfection protocol (Polyplustransfection SA, Illkirch, France). CT-ECFC were transfected  
91 with the SignalSilence® SIRT1 siRNA (#12241, Cell Signaling) or SignalSilence® Control  
92 siRNA using the jetPRIME *in vitro* siRNA transfection protocol (Polyplustransfection SA,  
93 Illkirch, France).

#### 94 **Drug Treatment.**

95 ECFC were incubated with 1µM Resveratrol (RSV) (Calbiochem, La Jolla, USA), 2µM  
96 SB203580 (p38MAP Kinase inhibitor) suspended in DMSO. For nicotinamide (NAM),  
97 medium containing 1mM NAM was added to cells. All the doses for drug treatment were  
98 determined by dose and time-response experiments in pilot experiments or previous  
99 studies.<sup>1</sup> Control cells were mock-treated with DMSO.

#### 100 **Senescence-Associated-β-galactosidase (SA-β-gal) staining.**

101 SA-β-Gal activity was performed using a Promokine Senescence detection kit (PK-CA577-  
102 K320, PromoCell) according to the manufacturer's instructions. Percentage of SA β-gal  
103 positive cells was counted in 10 randomly selected microscopic fields (magnification x20;  
104 400-600 cells).

#### 105 **Apoptosis.**

106 The number of apoptotic ECFC was determined by staining with the FITC-Annexin V/7-AAD  
107 kit according to the manufacturer's instructions (Beckman Coulter) on a Gallios Flow  
108 cytometer (Beckman Coulter).

#### 109 **Western Blot analysis.**

110 For western blot analysis, equal amount of proteins (30µg) from ECFC were separated on 4-  
111 12% gradient SDS-polyacrylamide gel, blotted on cellulose C+ membranes. Equal loading

112 was verified using Ponceau red solution. Membranes were blocked in 3% BSA-TBS, 1 hours  
113 at RT before proceeding to the antibody incubation. All primary antibody incubation was  
114 performed in blocking buffer overnight at 4°C. Horseradish peroxidase-conjugated anti-  
115 mouse or anti-rabbit antibodies were used as secondary antibodies and incubated for 1h at  
116 RT. Immunocomplexes were visualized by chemiluminescence using ECL according to  
117 manufacturer's instructions (Pierce, #32106). A G-BOX Imaging System (GeneSys) was used  
118 to catch up the specific bands, and the optical density of each band was measured using  
119 specific software (GeneTools, Syngene). After initial immunodetection, membranes were  
120 stripped of antibodies and re-probed with antibody against total protein or another protein  
121 with the same molecular weight. All proteins for each panel were assessed on one  
122 membrane, therefore actin expression need to be determined once to control for loading for  
123 all these proteins. The difference between the proteins of interest and the control loading  
124 protein of the same sample was calculated as relative content and presented graphically.

125 The antibodies against SIRT1 (#2493), p16<sup>INK4a</sup> (#4824), p21<sup>WAF</sup> (#2947), p53 (#9282), MKK6  
126 (#8550), MKK3 (#5674), Phospho-MKK3/MKK6 (#9236), Phospho-p38 MAP Kinase (#9211),  
127 p38 MAP Kinase (#9212), Phospho-Hsp27 (#2401), Phospho-MAPKAPK2 (#3007),  
128 Phospho-ATF2 (#5112) and actin (#8457) were purchased from Cell Signaling Technology  
129 (Danvers, MA) and used at the recommended dilution for immunoblotting (1:1000).

### 130 **RNA isolation and quality control.**

131 ECFC were harvested from cultures dishes and total RNA was extracted using the mirVana  
132 miRNA Isolation Kit (Ambion), according to the manufacturer's recommendations. The  
133 quantity and quality of the RNA were assessed using a Nanodrop (Thermo Science, Orsay,  
134 France) and a 2100 bioanalyzer (Agilent Technologies, Massy, France), respectively. All  
135 samples used in microarrays study, showed common, high quality RNA Integrity Numbers  
136 (RIN 9.0-9.8).

### 137 **Quantitative-Real-Time PCR.**

138 Two-step RT-PCR was performed. Total RNA was reverse transcribed into cDNA using the  
139 High Capacity cDNA Archive Kit (Applied Biosystems, Foster City, California, USA). cDNA  
140 product was amplified in a 20µl reaction on MxP3000 (Stratagene, NL) using the Brilliant  
141 QPCR Master Mix (Stratagene, La Jolla, CA) using pre-designed primers for SIRT1  
142 (HS01009003\_m1), p16<sup>INK4a</sup> (HS00233365\_m1), p21<sup>WAF</sup> (HS00355782\_m1), p53  
143 (HS01034249\_m1), MAP2K6 (HS00992389\_m1) and RPL13A (HS00204173\_m1) (Applied  
144 Biosystems). The PCR program consisted of an initial denaturation at 95°C for 10 minutes  
145 followed by amplification for 40 cycles (95°C for 15 seconds, 60°C for 1 minute). Each sample  
146 was run in duplicate, and the relative fold change was determined using the 2<sup>-ΔΔCT</sup> methods  
147 with CT-ECFC as baseline, normalized to RPL13A expression.

### 148 **Microarrays.**

149 The microarray study was performed using microarrays chip that included 45,000 probes (1  
150 microarray for each sample, 4x44K Whole Genome Microarray G4112F) and the One-Color  
151 Microarray-Based Gene Expression Analysis based on the Agilent Technologies  
152 procedures<sup>7</sup>. Briefly, 400ng of total RNA were converted to cDNA, followed by in vitro  
153 transcription and incorporation of Cy3-CTP into nascent cRNA. The hybridization was  
154 performed for 17h at 65°C. cRNA labeling and hybridization performance were performed  
155 and all parameters checked were found within the manufacturers specifications. Arrays were

156 scanned as described in the manufacturers' protocol. Signal intensities on 20 bit tiff images  
157 were calculated by Feature Extraction software (FE, Version 8.5; Agilent Technologies).

158 Data analyses were conducted with GeneSpring GX software (Vers.13.1.1; Agilent  
159 Technologies). Probe signal intensities were quantile normalized across all samples to  
160 reduce inter-array variability<sup>8</sup>. Input data pre-processing was established by baseline  
161 transformation to the median of all samples. After grouping of biological replicates according  
162 to their respective experimental condition, a given transcript had to be expressed above  
163 background (i.e. called "detected" or "Marginal" by GeneSpring) in at least 80.0 percent of  
164 samples in any 1 out of 2 conditions to be further analyzed in pairwise comparisons of  
165 conditions.

166 We considered genes to be differentially expressed when the adjusted p value was below  
167 0.05, as determined by a moderated T-test supplemented with Benjamini-Hochberg multiple  
168 testing corrections, and the absolute fold-change (FC) was higher than 1.5. Unsupervised  
169 analyses were performed using principal component analysis (PCA) and hierarchical  
170 clustering. The average linkage was based on the Pearson correlation distance. Microarray  
171 data are available in the ArrayExpress database ([www.ebi.ac.uk/arrayexpress](http://www.ebi.ac.uk/arrayexpress)) under  
172 accession number E-MTAB-4860. Functional enrichment analysis was performed on  
173 selected genes with the DAVID bioinformatics tool using Gene Ontology (GO) pathways.  
174 Keywords were selected when the Benjamini-Hochberg-Corrected p value for enrichment  
175 was less than 0.01.

176 Pathway analysis was carried out using Pathway Analysis Module of GeneSpring. The  
177 Biopax pathways/networks exchange format from public databases (Wikipathways and  
178 KEGG, available on line: <http://www.wikipathways.org> and <http://www.genome.jp/kegg>) was  
179 imported into GeneSpring and the Find Significant Pathway tool was then used to identify the  
180 biological pathway for which there was significant enrichment in the differential expression  
181 gene list. Pathways with at least 5 differential expressed genes and a p-value $\leq$ 0.001 were  
182 considered for analysis.

### 183 **Chromatin Immunoprecipitation (ChIP) and real-time PCR.**

184 Chromatin immunoprecipitation was performed as described previously<sup>9</sup>. Precleared  
185 chromatin was incubated overnight at 4°C with 5  $\mu$ l of primary antibodies specific for SIRT1  
186 (#07-131) acH3K9 (#07-352) and H3 (#04-928) purchased from Millipore. After collection of  
187 immune complexes, DNA was recovered and quantified. Analysis of ChIP DNA samples was  
188 performed by quantitative PCR with the specific promoter regions described in the  
189 **Supplemental Table VII**. Real-time PCR experiments were performed using the SYBR®  
190 Premix Ex Taq™ (Takara Bio Inc, Japan) and analyzed using the stepOnePlus™ Real-Time  
191 PCR System (Applied Biosystems). qPCR values were normalized to the values obtained  
192 with the positive control (Chromosome 5) and to input DNA. For histone mark ChIP, after  
193 Chromosome 5 normalization, data were further normalized for the total histone H3 signal  
194 using the  $(2^{Ct(IP)-Ct(Ref)})$  equation.

### 195 **Functional Analysis**

#### 196 ***Preparation of Conditioned Medium***

197 Conditioned medium (CM) was collected after 48 hours of incubation with PT or CT-ECFC in  
198 completed medium and then clarified by two serial centrifugation steps (300g for 5min and

199 2000g for 15min, at 4°C) to remove cells debris and apoptotic bodies. CM was stored at -  
200 80°C for subsequent analyses. Fresh CM was used for EMP isolation and EMP-free CM  
201 preparation.

### 202 ***Microparticles Isolation.***

203 To obtain EMP fractions, clarified CM was subjected to differential ultracentrifugation steps  
204 (70,000g; 90min, from 4 to 8°C). EMP-free CM was obtained after the first ultracentrifugation,  
205 0.2µm filtered to remove vesicles > 200nm, and stored at -80°C for subsequent analysis. The  
206 resultant EMP pellet was washed twice in PBS in the same conditions. The final pellet  
207 containing the EMP fractions were diluted in EBM2 and stored at -80°C until subsequent use.  
208 The number of resulting EMP was quantified using high-sensitive flow cytometry as  
209 described above. The high-speed last wash supernatant was used as control (vehicle).

### 210 ***Cell culture***

211 Human umbilical venous endothelial cells (HUVEC) were isolated from term neonates cord  
212 vein according to the method of Jaffe et al<sup>10</sup> and used at the fourth passage. Early passage  
213 normal HUVEC were used as target cells to exclude the confounding effects of replicative  
214 senescence. HUVEC were cultured in EGM2 media (Lonza) and cells were stimulated with  
215 CM ± depleted in EMP or in complete medium with vehicle (SN), CT-EMP or PT-EMP (50  
216 EMP/Cell). The doses of EMP were chosen from pilot experiments aimed at identifying the  
217 optimal induction of senescence.

### 218 ***Senescence-Associated-β-galactosidase (SA-β-gal) staining.***

219 CM or EMP from each condition were added to naïve cells (6,000 cells/wells) in 96-well  
220 culture dishes and incubated for 48h. SA-β-Gal activity was performed using a Promokine  
221 Senescence detection kit as described above.

### 222 ***Proliferation assay***

223 The effect of CM or EMP treatment on HUVEC proliferation was assessed by measurement  
224 of BrdU incorporation using the Cell proliferation assay Kit according to the manufacturer's  
225 instructions (Roche Diagnostic Mannheim Germany). HUVEC were plated at 6,000 cells/wells  
226 in gelatin-coated 96-well culture plates in triplicate and were allowed to attach in complete  
227 medium. Subsequently, CM ± depleted in EMP or medium containing either vehicle (SN) or  
228 CT or PT-EMP was added for 24h. Thereafter, 10µM BrdU was added to each well and  
229 incubated overnight. BrdU incorporation was assayed by spectrophotometry using an optical  
230 density of 450nm.

### 231 ***Cell cycle analysis***

232 Cell cycle analysis was conducted by using a propidium iodide-based flow cytometry  
233 protocol. HUVEC (35,000 cell/wells in 24-well culture dishes) were incubated for 24hours  
234 with CM or EMP from each condition, harvested, fixed with 70% cold ethanol, and stained  
235 with propidium iodide. At least 10,000 events were acquired per sample with a Gallios flow  
236 cytometer system and analyzed using Kaluza® Analysis software (Beckman Coulter).

### 237 ***THP-1 adhesion to HUVEC***

238 THP-1 monocytic cells were cultured in RPMI 1640 with 10% heat-inactivated FCS. They  
239 were split one to tenth once a week. Adhesion of the monocytic cell line THP-1 to HUVEC  
240 was performed as described by Akeson et al<sup>11</sup> using calcein-labeled cells. HUVEC (6,000  
241 cells per wells) were stimulated with CM or EMP from each condition, for 48h in 96-well  
242 plates. THP-1 cells were labeled with 10 $\mu$ M Calcein-AM (C3100MP, Invitrogen) at 37°C for  
243 30min and 10<sup>6</sup>cells/ml. At the end of the stimulation, 40,000 calcein-labeled THP-1 per well  
244 were incubated with HUVECs for 30min in RPMI medium. Adhesion to HUVEC was  
245 measured according to the method published by Vaporcyan et al<sup>12</sup>. Experiments were  
246 performed in triplicates.

#### 247 **Western Blot Analysis**

248 Western blotting was used to examine levels of cell cycle/senescence proteins in HUVEC  
249 treated with medium containing vehicle (SN), CT or PT-EMP for 24hours. Cellular proteins  
250 were obtained, and western blotting was performed as described above. Antibodies of  
251 p16<sup>INK4a</sup>, p21<sup>WAF</sup>, actin were purchased from Cell Signaling Technology Inc.

#### 252 **Statistical Analysis**

253 All the statistical analyses were performed using the software GraphPad Prism software and  
254 significance was calculated with 95% confidence interval ( $\alpha < 0.05$ ) Data are expressed  
255 as means  $\pm$  SEM. Demographic data of the preterm and term populations were analyzed  
256 qualitatively using the chi2 test of Pearson and quantitatively using the 2-tailed unpaired t  
257 test. Normality was confirmed with a D'Agostino and Pearson omnibus test. For data  
258 normally distributed, statistical significance was assessed by an unpaired or pair Student t-  
259 test, as appropriate. For data not normally distributed, we used a Mann-Whitney or Wilcoxon  
260 test, as appropriate. When ANOVA was utilized, post-hoc intergroup comparison were  
261 analyzed for statistical significant differences using either Tukey's (all group compared to  
262 each other) or Dunnet's (groups compared to control group) methodology, as appropriate.  
263 Statistical significance was accepted at p-value < 0.05.

264

265

266

267 **Additional Figures and Tables**

268

269

A

|   | A          | B         | C         | D     | E     | F      | G     | H         |
|---|------------|-----------|-----------|-------|-------|--------|-------|-----------|
| 1 | POS        | POS       | NEG       | NEG   | G-CSF | GM-CSF | GRO   | GRO alpha |
| 2 | POS        | POS       | NEG       | NEG   | G-CSF | GM-CSF | GRO   | GRO alpha |
| 3 | IL-1 alpha | IL-2      | IL-3      | IL-5  | IL-6  | IL-7   | IL-8  | IL-10     |
| 4 | IL-1 alpha | IL-2      | IL-3      | IL-5  | IL-6  | IL-7   | IL-8  | IL-10     |
| 5 | IL-13      | IL-15     | IFN gamma | MCP-1 | MCP-2 | MCP-3  | MIG   | RANTES    |
| 6 | IL-13      | IL-15     | IFN gamma | MCP-1 | MCP-2 | MCP-3  | MIG   | RANTES    |
| 7 | TGF beta 1 | TNF alpha | TNF beta  | BLANK | BLANK | BLANK  | BLANK | POS       |
| 8 | TGF beta 1 | TNF alpha | TNF beta  | BLANK | BLANK | BLANK  | BLANK | POS       |

B

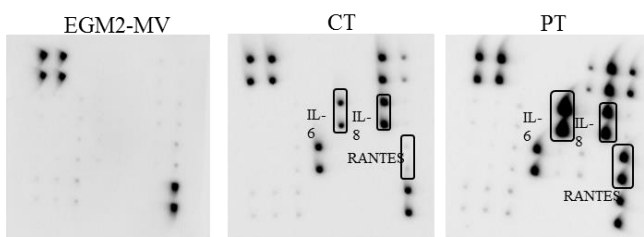

C

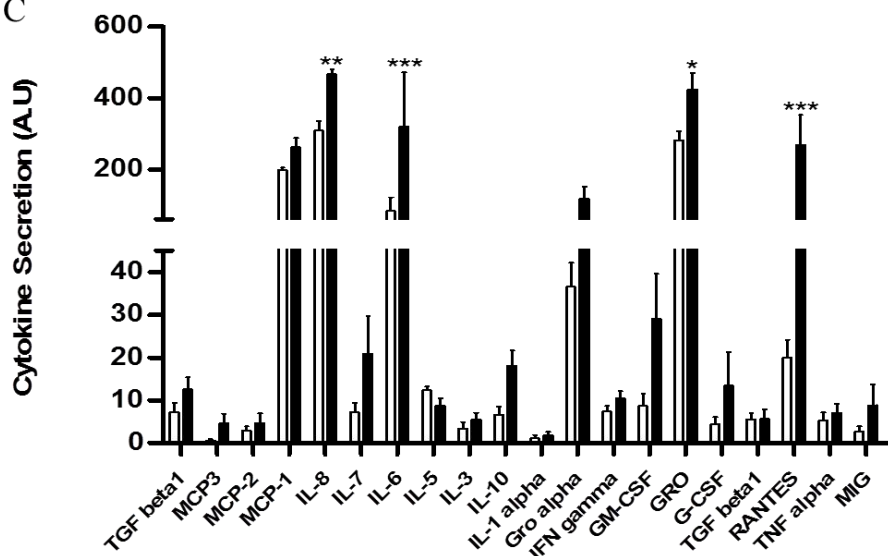

270

271 **Figure S1. Prematurity modulates cytokines secretory phenotype**

272 **(A)** Cytokine array map from RayBiotech. **(B)** Representative images of cytokine array  
 273 incubated with EGM2-MV only, conditioned media from CT and PT-ECFC obtained after 48h  
 274 of culture. Boxes show the binding signals of IL6, IL8 and RANTES **(C)** Quantification of  
 275 cytokines array signal of protein spot using GeneTools Syngen. Data are represented as  
 276 means ± SEM from 4 CT- and 4 PT independent samples

277

278



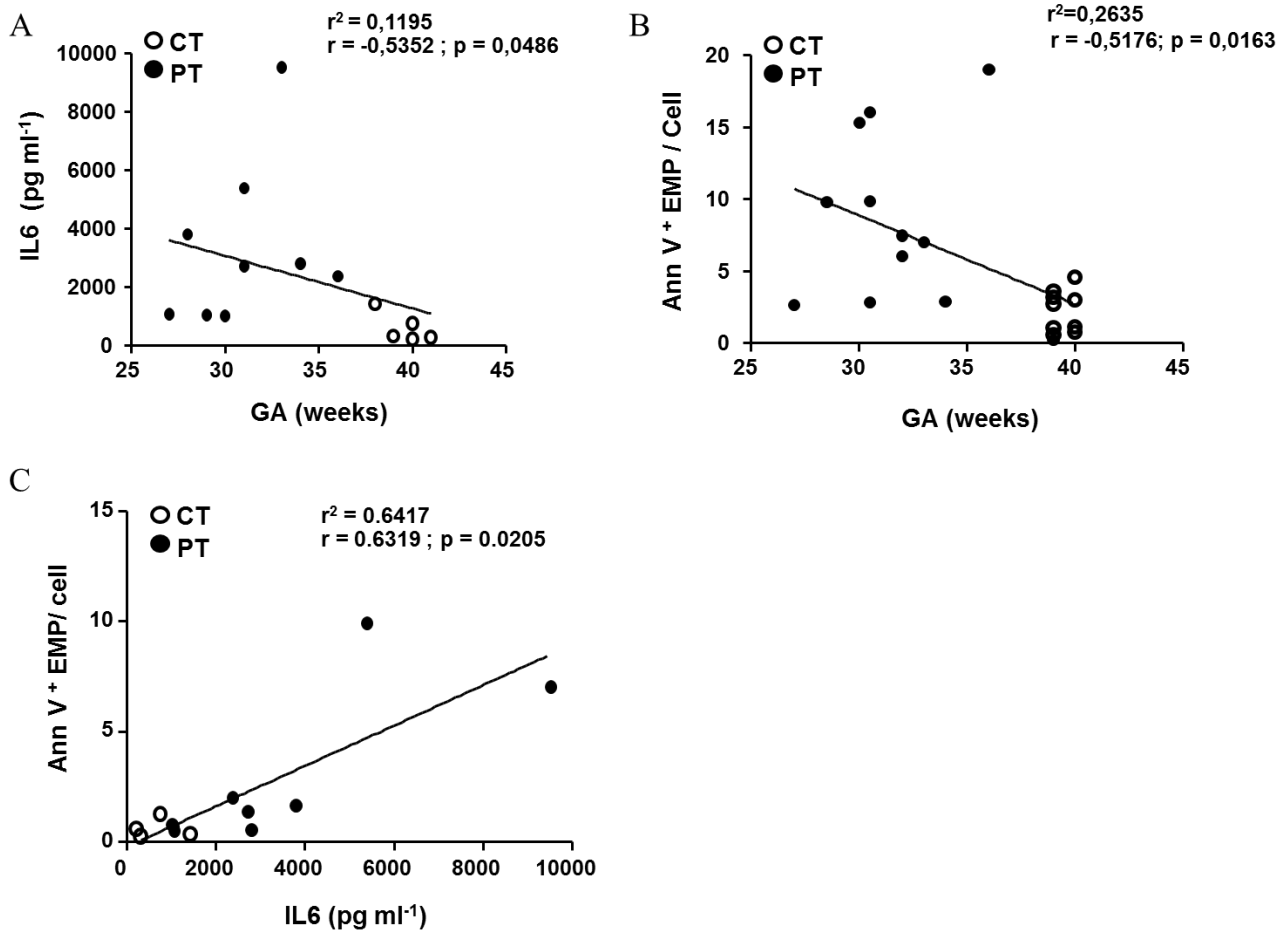

279

280 **Figure S2. Relation between IL6, EMP levels and gestational aging (GA)**

281 **(A)** IL6 level in conditioned medium negatively correlated with gestational age of neonates in  
 282 samples from all groups (n=14);r, Spearman correlation coefficient. **(B)** AnnV<sup>+</sup> EMP level in  
 283 conditioned medium negatively correlated with gestational age of neonates in samples from  
 284 all groups (n=20); r, Pearson correlation coefficient. **(C)** AnnV<sup>+</sup> EMP correlated with IL6 levels  
 285 in conditioned media in samples from all groups (n=13) r, Spearman correlation coefficient.

286

287

288

289

290

291

292

293

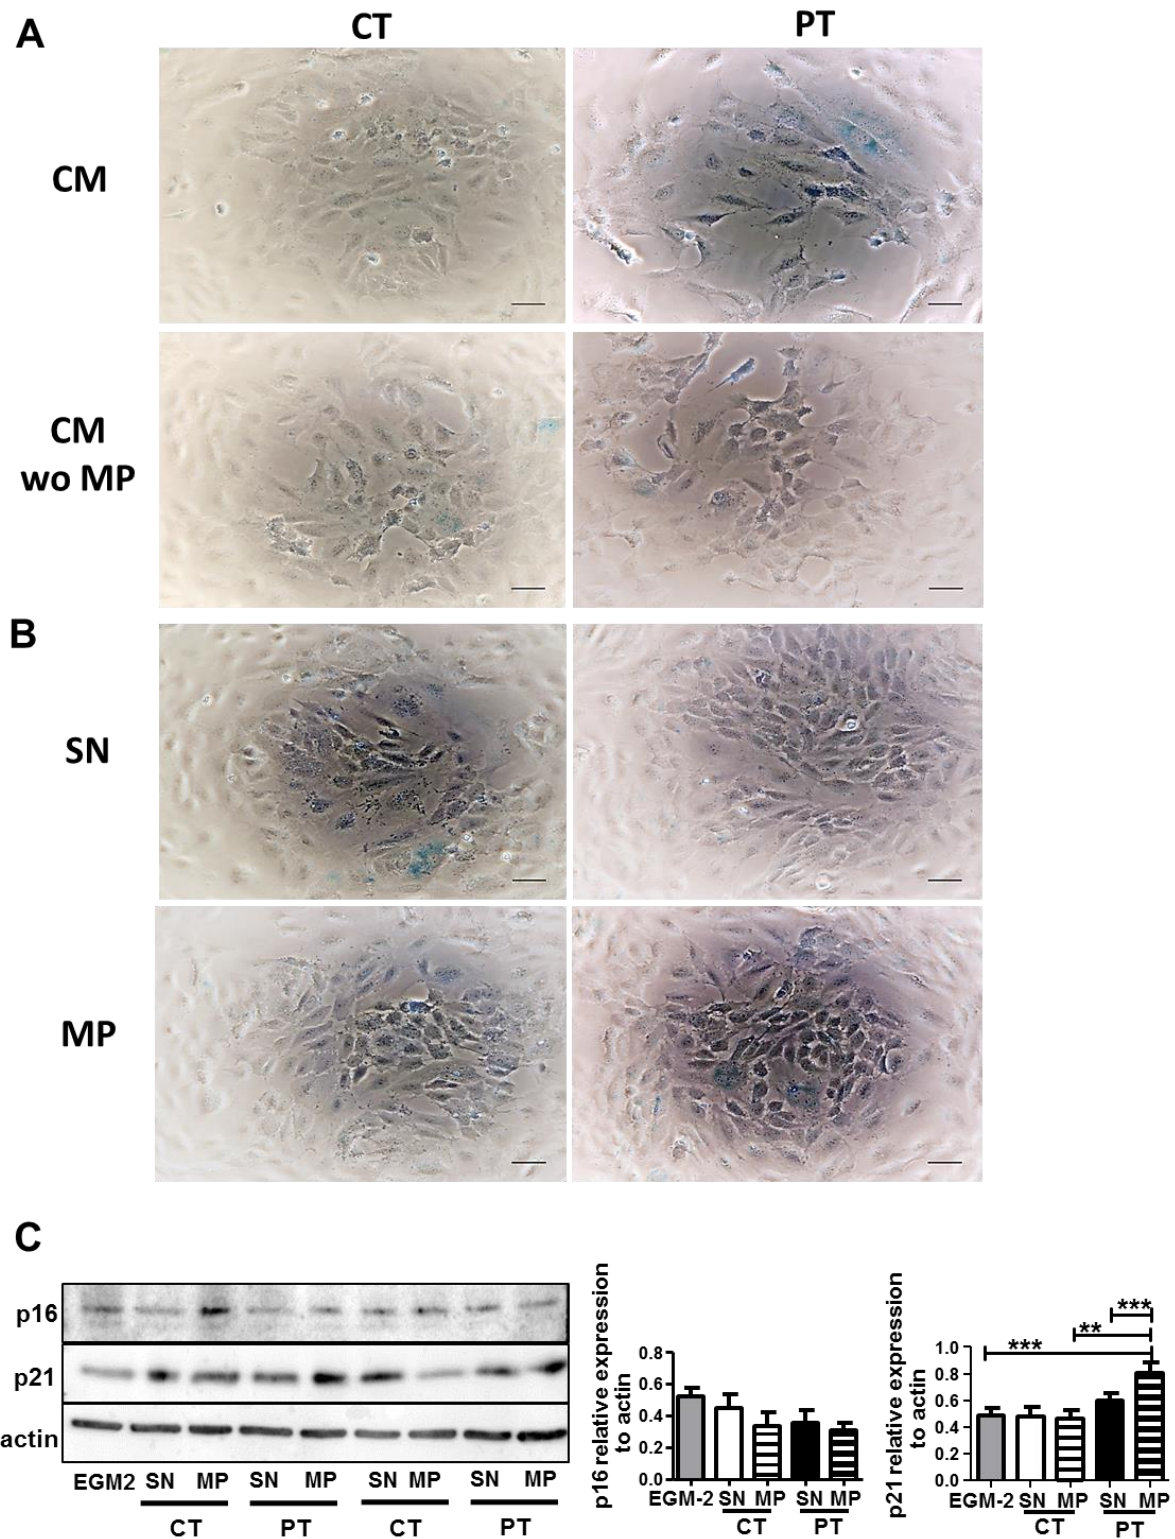

294

295 **Figure S3. EMP components of PT-SASP mediate paracrine senescence**

296 HUVEC were cultured and treated with conditioned media (CM) ± depleted in EMP **(A)** or  
 297 purified EMP from CT- and PT-ECFC **(B)**. After 48h, SA-β-gal staining was performed for  
 298 evaluation of the senescence status. Representative results of SA-β-galactosidase staining  
 299 are shown (original magnification x20, scale bar, 49μm). **(C)** The impact of EMP treatment on  
 300 p16 and p21 protein expression levels (relative expression to actin; HUVECs, N=7; N= 6 CT  
 301 vs. 6 PT). Graphs represented means ± SEM. \*\*: p<0.01, \*\*\*: p<0.001.

302

303

A

304

CT

305

306

307

308

309

310

311

312

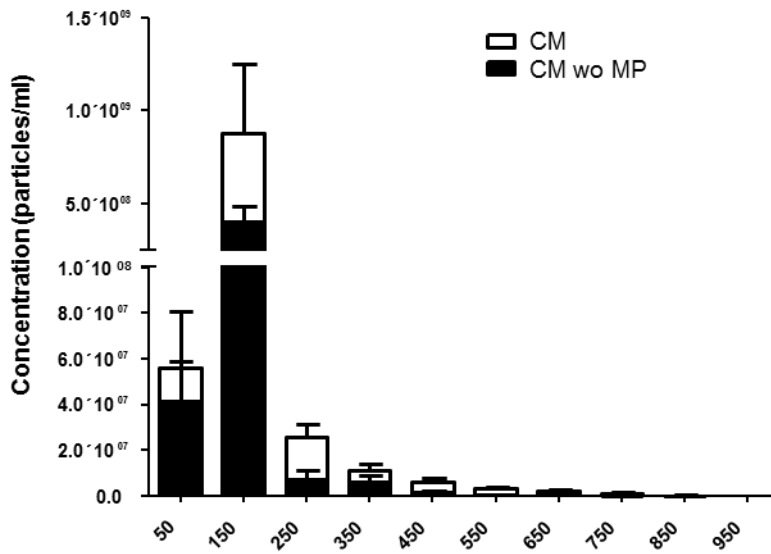

313

B

314

PT

315

316

317

318

319

320

321

322

323

324

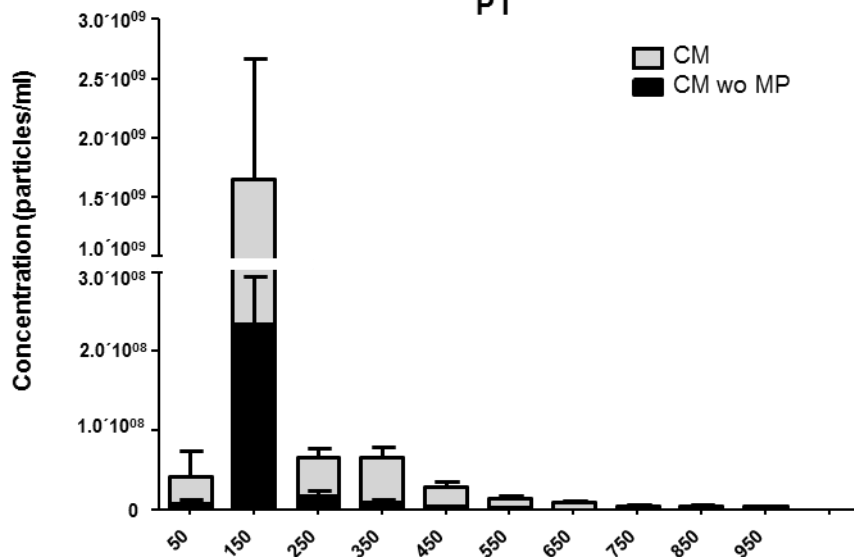

325

**Figure S4. Sequential centrifugation and filtration of CM conducted to EMP depletion.**

326

qNano analysis of conditioned media from **(A)** and PT-CM **(B)** ± depleted in EMP. The figure

327

depicts the diameter of the vesicles (in nm) versus the normalized concentration of vesicles

328

(in particles/ml). 100-nm bin size.

329

330

331

332

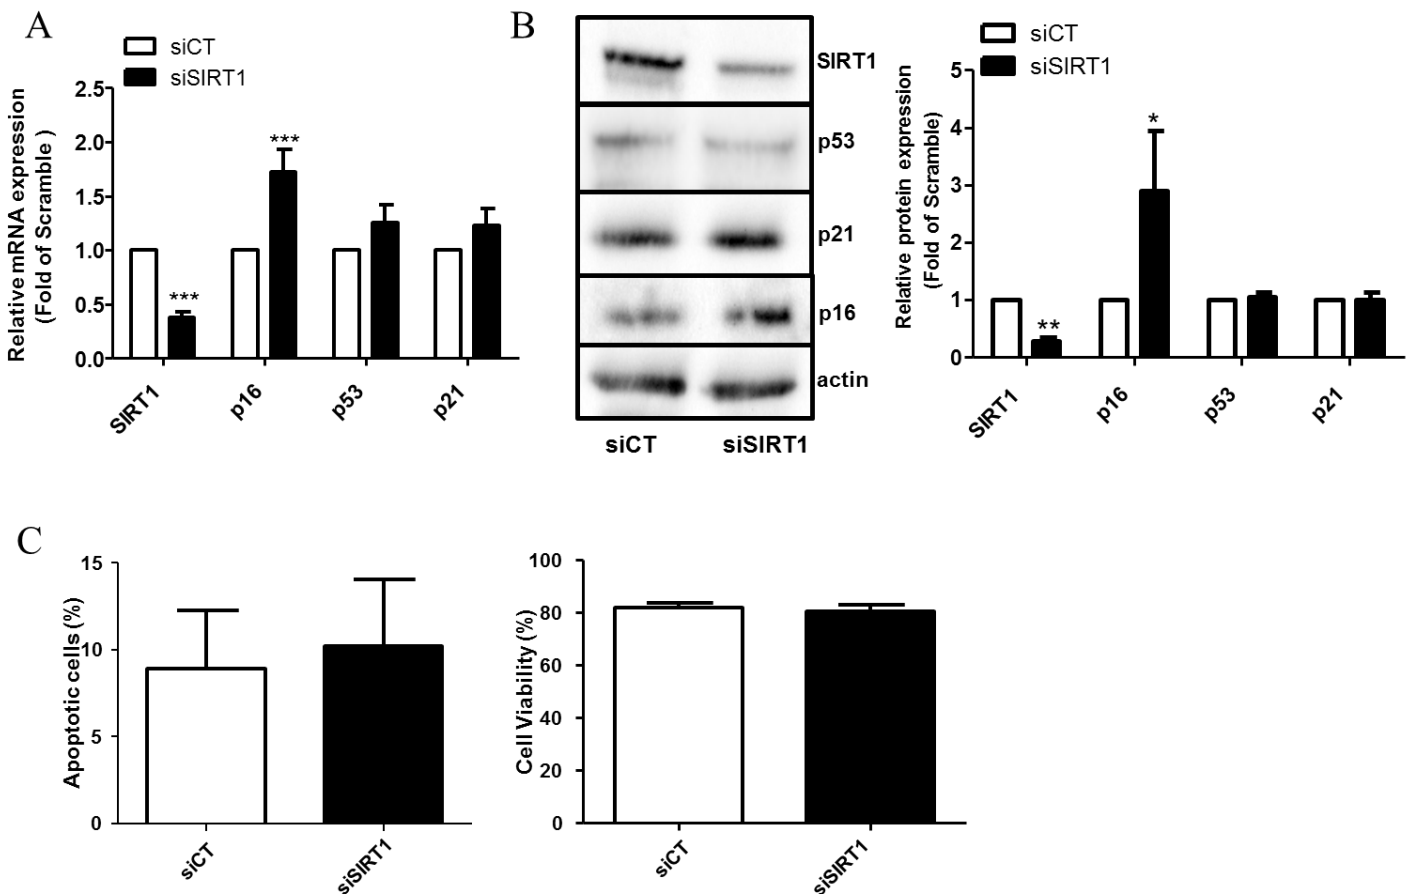

334

### 335 **Figure S5. Modeling of PT-like senescence by SIRT1 silencing in CT-ECFCs**

336 SIRT1 and senescent markers (p16, p53 and p21) mRNA **(A)** and protein **(B)** expression in  
 337 CT-ECFC, transfected with SIRT1 siRNA (siSIRT1) or Scramble (siCT), were assessed by  
 338 RT-qPCR and western blot analysis respectively. **(A)** Impact of SIRT1 silencing on mRNA  
 339 level. Two days after transfection, SIRT1 knockdown was monitored by quantitative RT-PCR  
 340 analysis on Stratagen MX3000, together with the expression of p 16, p53 and p21. Changes  
 341 in mRNA were normalized to the housekeeping gene RPL13A. Results were expressed as  
 342 fold induction of mRNA level in SIRT1 siRNA-transfected PT-ECFC compared with siCT.  
 343 Graph represented means  $\pm$  SEM of 11 independent experiments. \*\*\*  $p < 0.001$  **(B)** The  
 344 impact of SIRT1 silencing on the senescence associated protein expression of CT-ECFCs  
 345 was monitored by western blot. Representative experiment is shown. Actin was used as the  
 346 internal control. The fold induction of protein expression in SIRT1-Knockdown CT-ECFC was  
 347 calculated in comparison of matched scramble (siCT) transfected cells. Graphs represented  
 348 means  $\pm$  SEM of the relative intensity of 11 independent experiments. \* $p < 0.05$ ; \*\* $p < 0.01$  **(C)**  
 349 Cell viability was analyzed by flow cytometry using fluorescent Annexin V membrane labeling  
 350 and 7AAD incorporation into DNA. No difference in the number of viable, apoptotic or  
 351 necrotic cells were observed between CT-ECFC transfected with siCT or siSIRT after 48h.  
 352 Data are mean percentage of cells  $\pm$  SEM of 6 independent experiments.

353

354

355

356

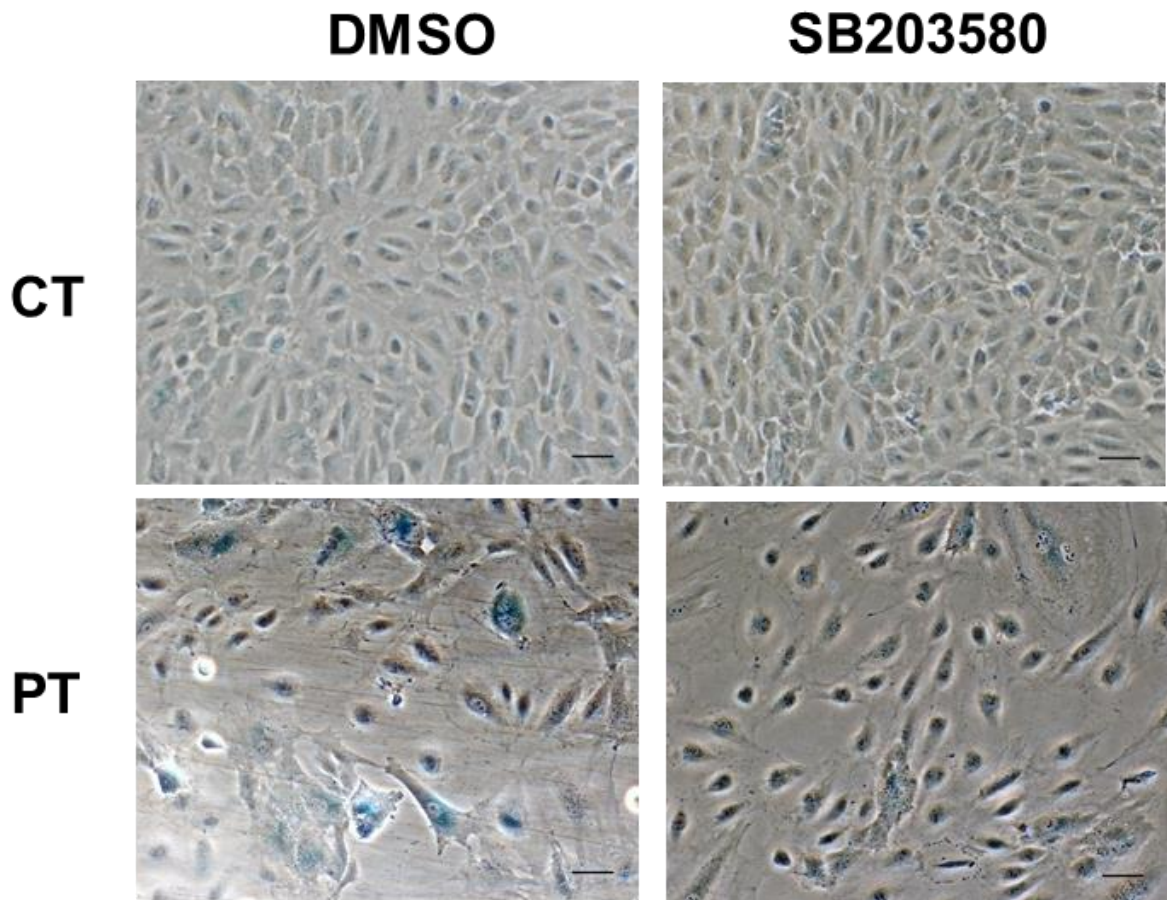

357

358

359 **Figure S6. SB203580 treatment reverts PT-ECFC senescence**

360 CT-ECFC and PT-ECFC were incubated in the presence or not of 2 $\mu$ M SB203580 for 48h.  
361 SA- $\beta$ -gal staining was performed for evaluation of the senescence status. Representative  
362 images of SA- $\beta$ -gal staining are shown (original magnification x20, scale bar, 49 $\mu$ m).

363

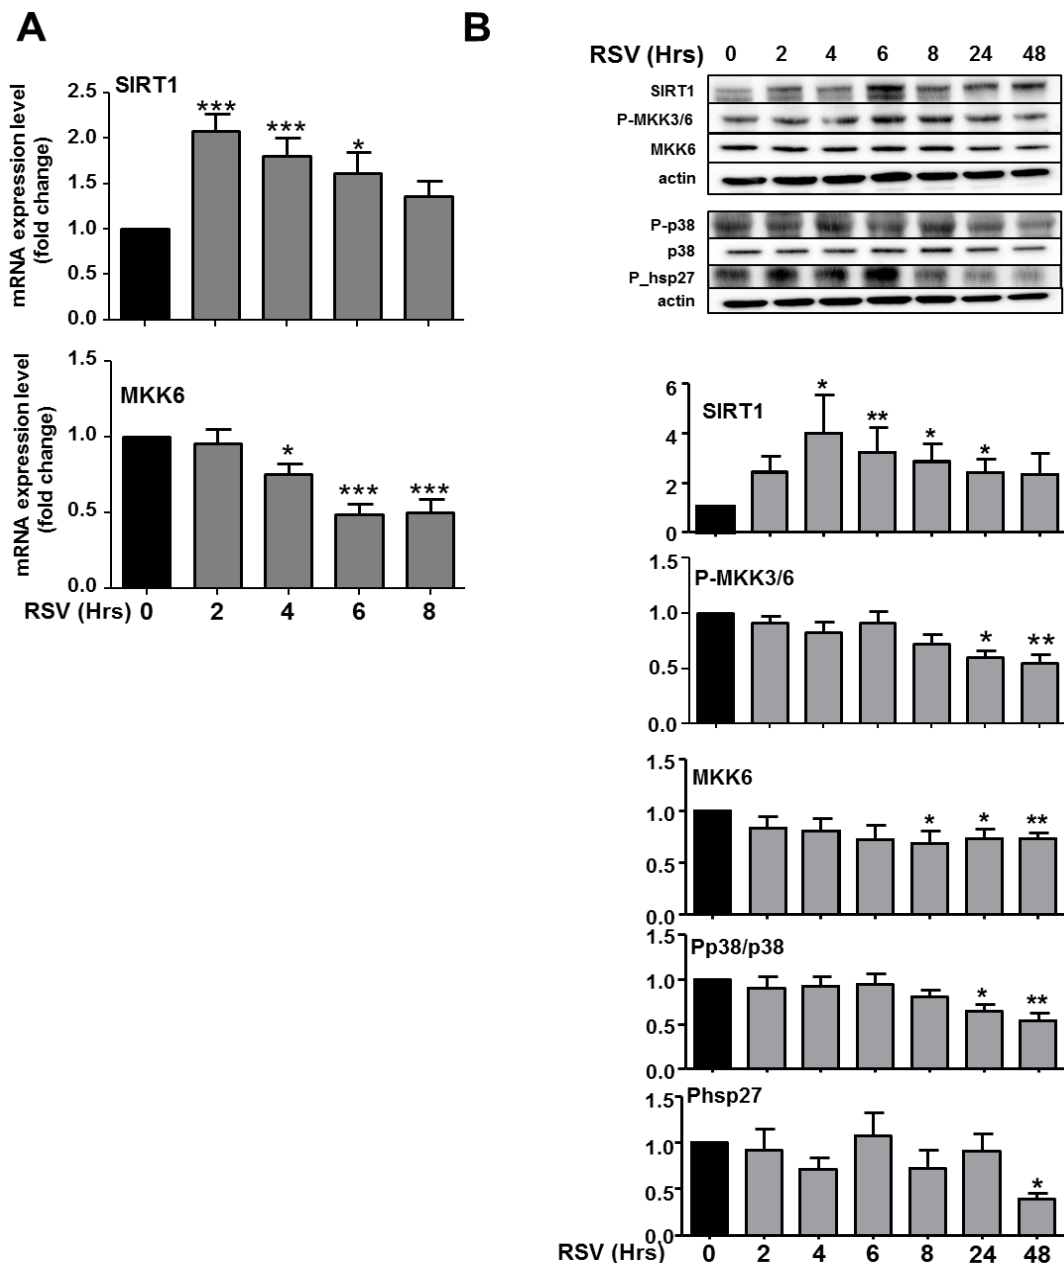

364

365 **Figure S7. Resveratrol inhibits MKK6 expression and p38<sup>MAPK</sup> activation.**

366 PT-ECFC were treated with 1 $\mu$ M RSV or solvent alone (DMSO) for different times. **(A)** Time-  
 367 dependent changes in the level of SIRT1 and MKK6 were determined by qRT-PCR analysis  
 368 on a Stratagen MX3000. Changes in mRNA were normalized to the housekeeping gene  
 369 *RPL13A*, as described in "Methods". Results were expressed as fold induction of mRNA level  
 370 in RSV-stimulated PT-ECFC compared to DMSO-treated PT-ECFC. Data are means  $\pm$  SEM  
 371 of 8-10 independent samples. \*  $P < 0.05$ , \*\*\*  $P < 0.001$ . **(B)** Time dependent modulation in  
 372 SIRT1 and MKK6/p38MAPK pathways proteins in RSV-treated PT-ECFC. Each whole cell  
 373 lysate (30 $\mu$ g) was resolved on 4-12% SDS-PAGE gradient under reducing conditions. Blots  
 374 were probed with anti-SIRT1, P-MKK3/6, MKK6, Pp38, p38, Phsp27 polyclonal antibodies or  
 375 with anti- $\beta$ -actin polyclonal antibody as a loading control. Staining intensity was measured by  
 376 densitometry and normalized to  $\beta$ -actin. Results were expressed as fold induction of protein  
 377 expression in RSV-stimulated PT-ECFC compared with DMSO-treated PT-ECFC. Bars  
 378 represent mean  $\pm$  SEM of the relative intensities in 6-10 independent samples. \*  $P < 0.05$ , \*\*  
 379  $P < 0.01$ .

380

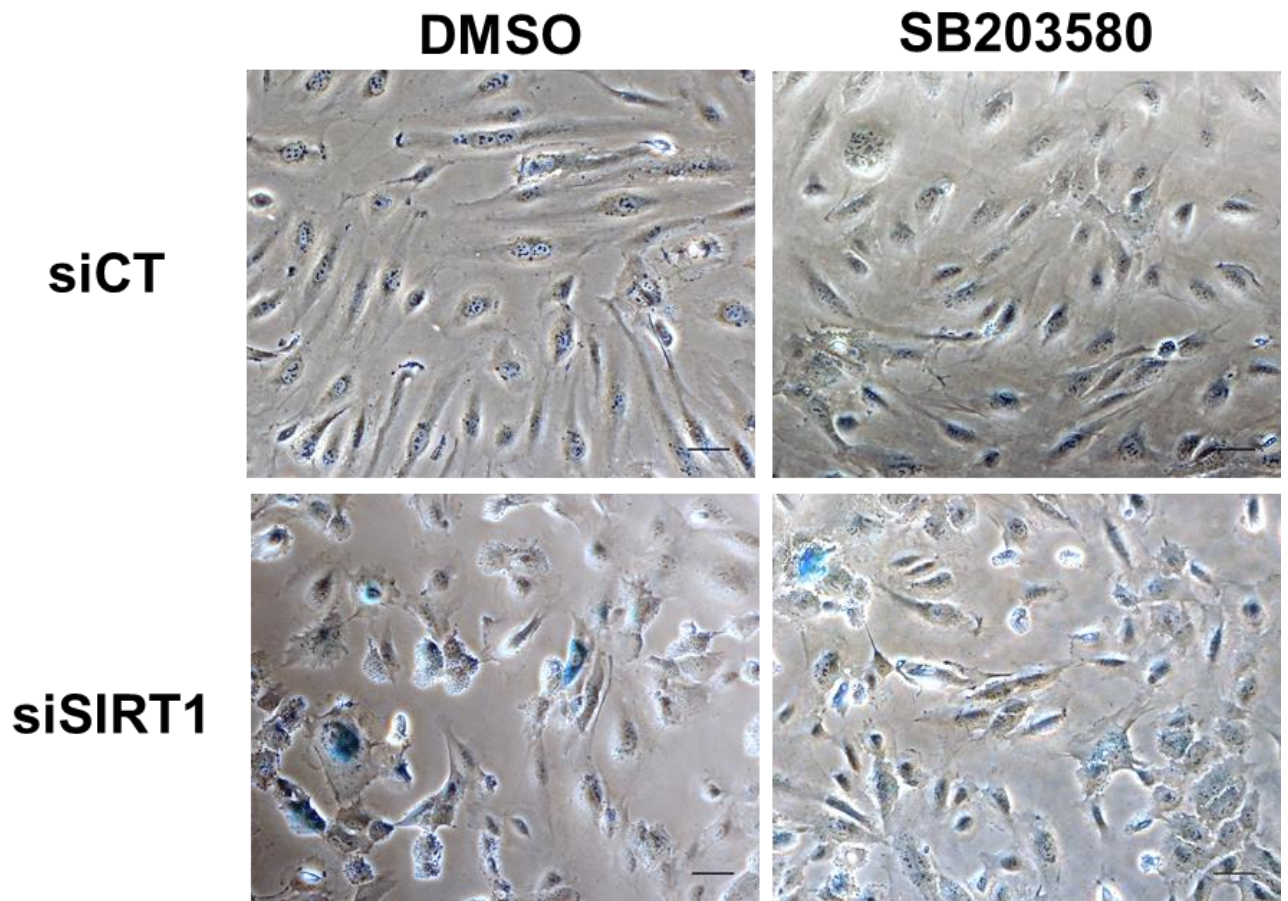

381

382 **Figure S8. SB203580 treatment reverts CT-ECFC senescence induced by SIRT1 siRNA.**

383 After transfection with siRNA control (siCT) or SIRT1 (siSIRT1), CT-ECFC were incubated in  
384 the presence or not of 2 $\mu$ M SB203580 for an additional 24h. SA- $\beta$ -gal staining was  
385 performed for evaluation of the senescence status. Representative images of SA- $\beta$ -gal  
386 staining are shown (original magnification x20, scale bar, 49 $\mu$ m).

387

Figure 1

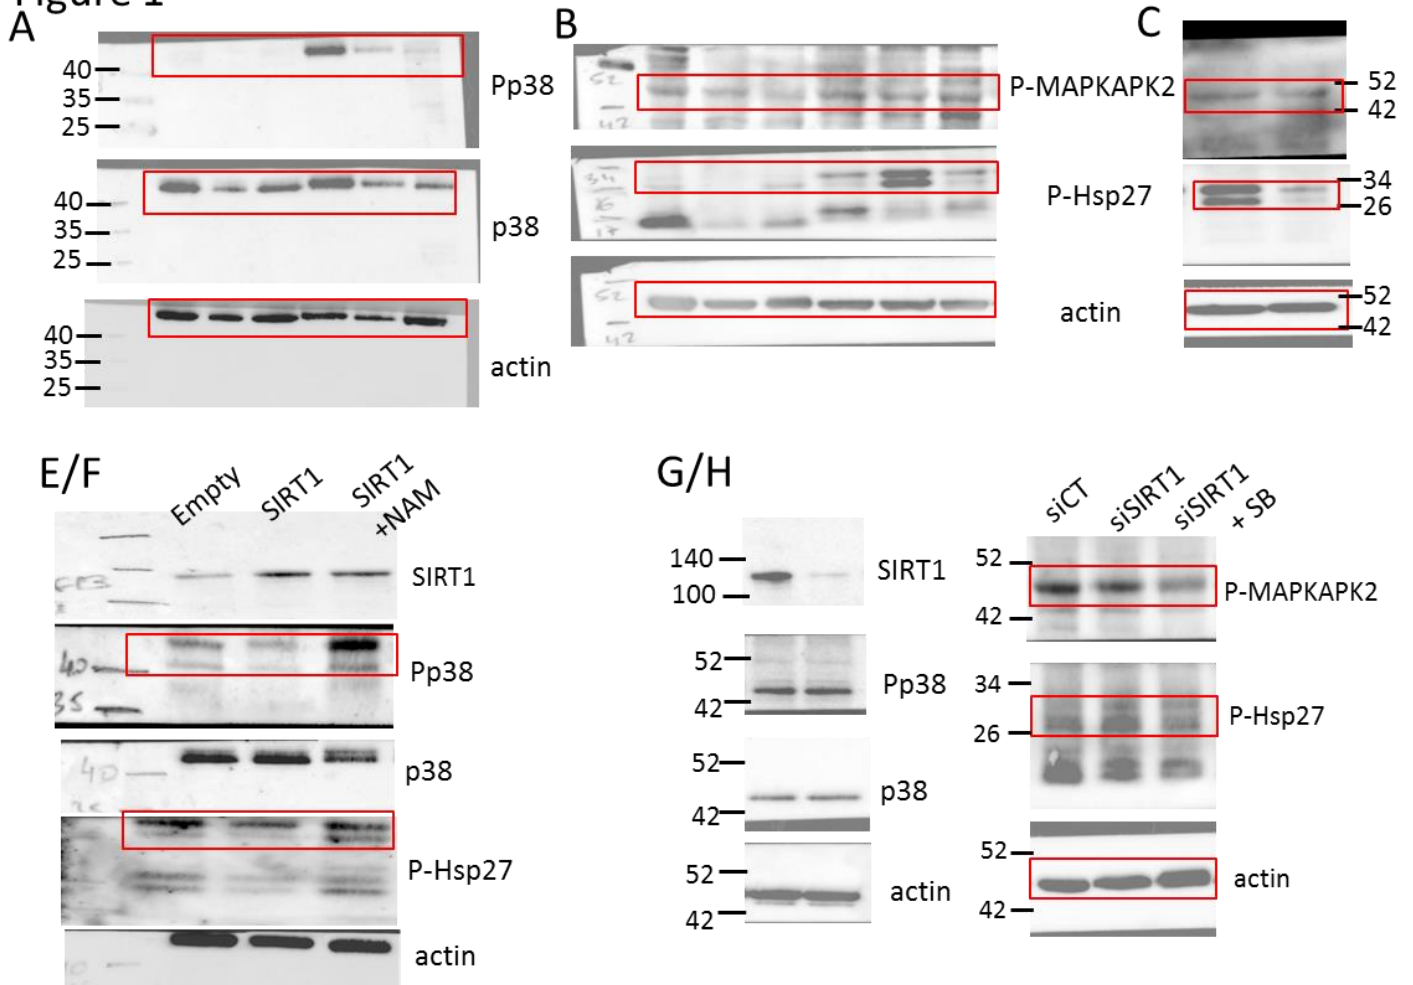

Figure 2

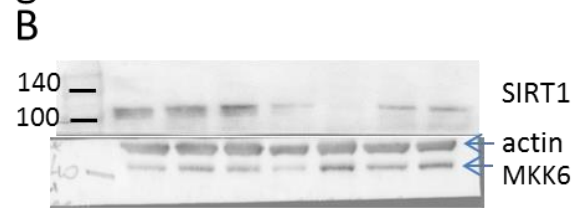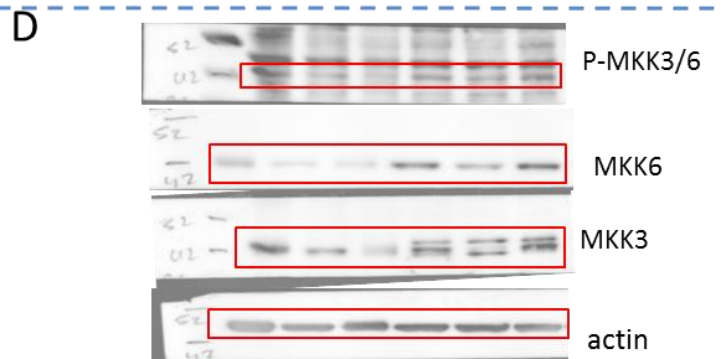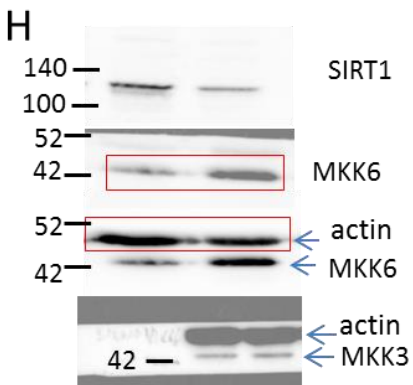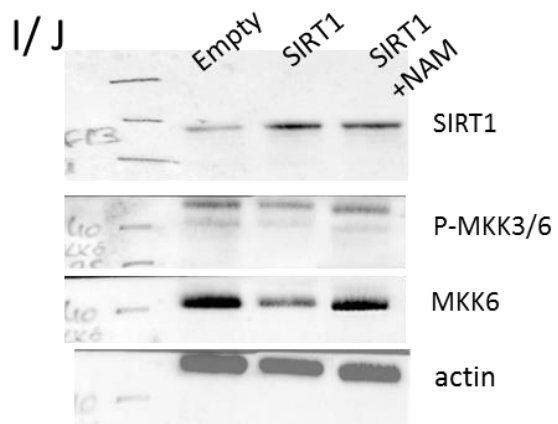



389  
390  
391  
392

**Table S1: Clinical characteristics of mothers and neonates.**

| Characteristics                       | Normal birth weight term neonates | Low birth weight preterm neonates | P value             |
|---------------------------------------|-----------------------------------|-----------------------------------|---------------------|
| Maternal data                         |                                   |                                   |                     |
| Number                                | 18                                | 28                                |                     |
| Age, years                            | 32.67 ± 1.268                     | 30.10 ± 1.130                     | NS*                 |
| Primigravida, n (%)                   | 3 (17%)                           | 8 (28%)                           | NS <sup>†</sup>     |
| Primiparity, n (%)                    | 4 (22%)                           | 14 (50%)                          | NS <sup>†</sup>     |
| Multiple pregnancies, n (%)           | 0 (0%)                            | 5 (18%)                           | NS <sup>†</sup>     |
| Antenatal steroid therapy, n (%)      | 0 (0%)                            | 27 (96%)                          | 0.0001 <sup>†</sup> |
| HTA, Preeclampsia, n (%)              | 1 (5%)                            | 3 (11%)                           | NS <sup>†</sup>     |
| Premature rupture of membranes, n (%) | 0 (0%)                            | 16 (57%)                          | 0.0001 <sup>†</sup> |
| Cesarean section, n (%)               | 11 (61%)                          | 23 (82%)                          | NS <sup>†</sup>     |
| Infant data                           |                                   |                                   |                     |
| Number                                | 18                                | 29                                |                     |
| Mean gestational age (w)              | 39.44 ± 0.2321                    | 31.07 ± 0.5160                    | 0.0001*             |
| Number by gestational age (w)         |                                   |                                   |                     |
| ≤ 28                                  |                                   | 4                                 |                     |
| 28-32                                 |                                   | 11                                |                     |
| 32-36                                 |                                   | 14                                |                     |
| ≥ 37                                  | 18                                |                                   |                     |
| Mean birth weight, (gr)               | 3547 ± 107.3                      | 1573 ± 94.20                      | 0.0001*             |
| Number with birth weight, (gr)        |                                   |                                   |                     |
| ≤ 1,500                               |                                   | 15                                |                     |
| 1,510-2,000                           |                                   | 7                                 |                     |
| 2,010-2,700                           |                                   | 7                                 |                     |
| ≥ 2,700                               | 18                                |                                   |                     |
| Male                                  | 10 (55%)                          | 22 (75%)                          | NS <sup>†</sup>     |
| Small for gestational, n (%)          | 0                                 | 4 (14%)                           | NS <sup>†</sup>     |

417 Significant differences were determined by: \*: two-tailed unpaired t-test, <sup>†</sup>: the chi<sup>2</sup> test of  
418 Pearson. NS indicates not significant, No, number; and HTA, arterial hypertension

419

420

421

422 **Table S2:** Genes upregulated in PT-ECFC relative to CT-ECFC

| ProbeName           | Gene Symbol   | FC (abs)         | p (Corr)           | p                   |
|---------------------|---------------|------------------|--------------------|---------------------|
| A_23_P6335          | SERPIND1      | 17.095173        | 7.678564E-4        | 4.89907E-4          |
| A_24_P40306         | SERPIND1      | 16.277954        | 8.1287115E-4       | 5.295698E-4         |
| A_23_P78405         | LIPG          | 7.2464876        | 0.0011209381       | 9.524144E-4         |
| A_23_P399255        | RNF182        | 6.728418         | 0.0010643232       | 8.838832E-4         |
| A_24_P911179        | ASPM          | 6.2638187        | 6.8285596E-4       | 3.787817E-4         |
| A_23_P301530        | ANK3          | 6.10681          | 0.0012896705       | 0.0012074136        |
| A_32_P152348        | HIST1H2BD     | 5.7422314        | 3.3914755E-4       | 6.579644E-5         |
| A_23_P148753        | PLEKHA6       | 5.5711737        | 7.25094E-4         | 4.1766724E-4        |
| A_23_P202269        | ANK3          | 5.2564063        | 0.0011772255       | 0.0010377819        |
| A_32_P52386         | lnc-EVX1-3    | 5.137981         | 5.863832E-4        | 2.751593E-4         |
| A_23_P35871         | E2F8          | 4.5342784        | 7.3597586E-4       | 4.3520908E-4        |
| A_23_P258493        | LMNB1         | 4.3706193        | 3.7883423E-4       | 1.05525716E-4       |
| A_24_P237912        | TCAF2         | 3.9284492        | 8.3580194E-4       | 5.704987E-4         |
| A_23_P333998        | POLQ          | 3.918786         | 0.0011399247       | 9.815297E-4         |
| A_24_P43959         | FRMD4A        | 3.908402         | 6.8132184E-4       | 3.6937266E-4        |
| A_23_P381714        | CA13          | 3.6760795        | 3.530762E-4        | 8.6045104E-5        |
| A_24_P644742        | HAUS6         | 3.6420453        | 1.4953452E-4       | 2.0408825E-6        |
| A_32_P48842         | SMIM10        | 3.636104         | 9.4853743E-4       | 7.30309E-4          |
| <b>A_24_P416489</b> | <b>MAP2K6</b> | <b>3.4100718</b> | <b>9.960561E-4</b> | <b>7.9412217E-4</b> |
| A_24_P156781        | PIK3R3        | 3.2312868        | 3.530762E-4        | 8.962758E-5         |
| A_23_P48570         | DHRS2         | 3.2053542        | 8.3226775E-4       | 5.5892766E-4        |
| A_23_P366908        | CCSAP         | 3.1233194        | 3.530762E-4        | 8.928014E-5         |
| A_23_P22970         | PIK3R3        | 3.1112447        | 5.753532E-4        | 2.3764157E-4        |
| A_24_P272561        | ZDHHC13       | 3.0996451        | 6.834655E-4        | 3.814329E-4         |
| A_32_P24531         | lnc-PPA2-1    | 3.0588953        | 1.4953452E-4       | 1.1823589E-6        |
| A_24_P942328        | DHFR          | 3.0569654        | 7.25094E-4         | 4.15049E-4          |
| A_24_P171110        | HNRNPU        | 3.0213485        | 7.4082275E-4       | 4.6583818E-4        |
| A_32_P150891        | DIAPH3        | 2.9907699        | 8.4099243E-4       | 5.823729E-4         |
| A_24_P914240        | ZNF44         | 2.9426215        | 3.9035646E-4       | 1.1437247E-4        |
| A_23_P357270        | SLC17A4       | 2.9420094        | 4.2885364E-4       | 1.4360248E-4        |
| A_24_P298174        | CBX1          | 2.8406188        | 4.3390074E-4       | 1.4798886E-4        |
| A_32_P214925        | TCAF2         | 2.8308308        | 3.1580793E-4       | 5.611166E-5         |
| A_23_P398460        | HK2           | 2.8111115        | 5.448165E-4        | 2.146999E-4         |
| A_32_P99549         | HNRNPM        | 2.7831109        | 0.0011772255       | 0.0010355201        |
| A_23_P367071        | UBE2DNL       | 2.779436         | 5.5608887E-4       | 2.2710214E-4        |
| A_23_P254612        | DBF4          | 2.7611766        | 9.357628E-4        | 7.098155E-4         |
| A_23_P13065         | ZDHHC13       | 2.7572293        | 3.7883423E-4       | 1.06675216E-4       |
| A_23_P216396        | EXOSC2        | 2.7101634        | 5.5608887E-4       | 2.280091E-4         |
| A_32_P437876        | LOC100133315  | 2.7028432        | 5.2417937E-4       | 2.0537323E-4        |
| A_24_P269895        | HNRNPA3       | 2.6903505        | 2.2160183E-4       | 2.4205963E-5        |
| A_23_P107507        | CBX1          | 2.6487443        | 6.472328E-4        | 3.2353928E-4        |

|              |            |           |              |              |
|--------------|------------|-----------|--------------|--------------|
| A_24_P509177 | BBIP1      | 2.6450908 | 9.1396377E-4 | 6.677552E-4  |
| A_24_P207195 | IRX3       | 2.6363583 | 3.9035646E-4 | 1.1585139E-4 |
| A_24_P7873   | ELFN1      | 2.57549   | 4.3390074E-4 | 1.4838853E-4 |
| A_23_P106874 | PMFBP1     | 2.5639555 | 4.0550015E-4 | 1.2882068E-4 |
| A_24_P374759 | ERC2       | 2.5497077 | 7.4082275E-4 | 4.489376E-4  |
| A_24_P462899 | CENPW      | 2.5376422 | 0.0012781684 | 0.0011721656 |
| A_24_P281923 | DLAT       | 2.5170834 | 5.863832E-4  | 2.7445433E-4 |
| A_23_P42042  | LYRM2      | 2.5087917 | 3.3914755E-4 | 7.1503375E-5 |
| A_23_P18123  | NLGN1      | 2.4953845 | 4.6550616E-4 | 1.6329829E-4 |
| A_24_P8098   | NSD1       | 2.4857402 | 6.6392653E-4 | 3.4290564E-4 |
| A_24_P221634 | NSF        | 2.4809246 | 5.753532E-4  | 2.4155976E-4 |
| A_24_P488588 | HNRNPA3    | 2.4680638 | 1.9764541E-4 | 1.621892E-5  |
| A_23_P94133  | POP1       | 2.4363585 | 5.860619E-4  | 2.7100358E-4 |
| A_23_P379020 | GNRHR2     | 2.42962   | 6.8285596E-4 | 3.7953726E-4 |
| A_23_P168747 | NCAPG2     | 2.3888853 | 0.0012856561 | 0.0012007267 |
| A_24_P488586 | HNRNPA3    | 2.3774538 | 2.1504618E-4 | 2.1908027E-5 |
| A_24_P264211 | PTMA       | 2.3692524 | 2.1042408E-4 | 1.953397E-5  |
| A_32_P194264 | CHAC2      | 2.3672519 | 0.0013257653 | 0.0012955656 |
| A_23_P348737 | NR2F1      | 2.3437905 | 6.8244827E-4 | 3.7452832E-4 |
| A_24_P134727 | TFAM       | 2.3344986 | 2.2253957E-4 | 2.5926463E-5 |
| A_23_P337464 | LYRM7      | 2.3289406 | 6.932519E-4  | 3.9005288E-4 |
| A_23_P30972  | ASCC3      | 2.322726  | 5.753532E-4  | 2.5662556E-4 |
| A_24_P273413 | EML4       | 2.3222775 | 1.9351073E-4 | 1.4017561E-5 |
| A_24_P41629  | RPL21P44   | 2.3129685 | 1.4953452E-4 | 1.4046025E-6 |
| A_23_P84189  | PITPNC1    | 2.2808878 | 9.614214E-4  | 7.446088E-4  |
| A_23_P160934 | ANP32E     | 2.270519  | 6.8244827E-4 | 3.7620155E-4 |
| A_23_P94461  | FSD1L      | 2.2515883 | 0.0013146335 | 0.0012515283 |
| A_23_P112673 | ZWILCH     | 2.2462583 | 9.936622E-4  | 7.876866E-4  |
| A_24_P238499 | TYMSOS     | 2.2450159 | 8.3580194E-4 | 5.7259185E-4 |
| A_24_P391811 | DOCK10     | 2.2390528 | 8.3226775E-4 | 5.523558E-4  |
| A_24_P350576 | TNIK       | 2.2388287 | 3.3914755E-4 | 6.5607135E-5 |
| A_32_P353677 | ATAD3B     | 2.2353525 | 8.3580194E-4 | 5.749708E-4  |
| A_23_P373119 | HMG3BP1    | 2.227906  | 0.001164781  | 0.0010125949 |
| A_23_P120270 | MCFD2      | 2.2205472 | 6.8244827E-4 | 3.7323355E-4 |
| A_23_P397978 | TCAF2      | 2.218365  | 0.0013246301 | 0.0012872459 |
| A_32_P79504  | FANCM      | 2.2174225 | 0.0012856561 | 0.0011909598 |
| A_23_P96072  | GRIN1      | 2.2150614 | 9.3034335E-4 | 6.9934694E-4 |
| A_23_P97123  | ANKRD36BP1 | 2.1941137 | 0.0012856561 | 0.0011846541 |
| A_24_P82630  | SMCHD1     | 2.1919544 | 9.357628E-4  | 7.074582E-4  |
| A_24_P712350 | CHML       | 2.1908178 | 3.530762E-4  | 8.7268236E-5 |
| A_24_P374427 | ZDHHC21    | 2.1868622 | 8.3226775E-4 | 5.5307406E-4 |
| A_24_P50829  | TRPM7      | 2.1837566 | 0.0013303839 | 0.0013083046 |
| A_32_P164649 | SAFB       | 2.1782699 | 2.1042408E-4 | 2.0131689E-5 |
| A_24_P45379  | CACYBP     | 2.1771054 | 0.0010630856 | 8.790435E-4  |
| A_24_P173727 | PEX10      | 2.1547015 | 0.0010188104 | 8.2703354E-4 |
| A_24_P829209 | HOXA-AS3   | 2.1397355 | 0.0012220357 | 0.0010939864 |
| A_23_P5616   | RIF1       | 2.1391141 | 9.022291E-4  | 6.377997E-4  |
| A_24_P89080  | DCK        | 2.1365762 | 9.1396377E-4 | 6.8055966E-4 |

|              |                |           |              |              |
|--------------|----------------|-----------|--------------|--------------|
| A_24_P336577 | FAM212B        | 2.1347034 | 9.574881E-4  | 7.393815E-4  |
| A_24_P286412 | CRCP           | 2.130663  | 8.782624E-4  | 6.161841E-4  |
| A_23_P349615 | SMC5           | 2.1305435 | 1.5677472E-4 | 4.6675923E-6 |
| A_23_P116123 | CHEK1          | 2.128699  | 9.110757E-4  | 6.583915E-4  |
| A_24_P267452 | CD3EAP         | 2.1262093 | 3.3914755E-4 | 7.3155854E-5 |
| A_23_P202258 | TFAM           | 2.121912  | 5.753532E-4  | 2.4746277E-4 |
| A_32_P233304 | LIN9           | 2.1196601 | 0.0010894343 | 9.1323873E-4 |
| A_23_P341275 | POP1           | 2.1136708 | 6.2940526E-4 | 3.1255203E-4 |
| A_23_P371876 | ALKBH8         | 2.1096797 | 4.0550015E-4 | 1.2614539E-4 |
| A_32_P229104 | LOC102723559   | 2.1083193 | 3.3914755E-4 | 7.660952E-5  |
| A_24_P219378 | CASKIN1        | 2.1071038 | 2.2239047E-4 | 2.5329211E-5 |
| A_32_P83776  | CCSAP          | 2.0994794 | 6.6236826E-4 | 3.394826E-4  |
| A_23_P346309 | BAX            | 2.0951953 | 7.25094E-4   | 4.2118217E-4 |
| A_23_P151405 | CKAP2          | 2.0916264 | 0.0013369208 | 0.00133083   |
| A_23_P102320 | NUP35          | 2.0900977 | 0.0013273369 | 0.0013001249 |
| A_24_P127174 | Inc-KIAA1267-3 | 2.0797536 | 6.8069116E-4 | 3.6707328E-4 |
| A_23_P250206 | GCK            | 2.0780714 | 8.7093835E-4 | 6.090617E-4  |
| A_24_P933492 | ZDHHC21        | 2.054908  | 2.4230906E-4 | 3.1985604E-5 |
| A_24_P196519 | MTAP           | 2.0537927 | 0.0013146335 | 0.0012547413 |
| A_32_P93149  | DDX10          | 2.0534158 | 9.819334E-4  | 7.739156E-4  |
| A_23_P122563 | PFDN6          | 2.0455096 | 6.6392653E-4 | 3.4481834E-4 |
| A_23_P54373  | RAB27A         | 2.0413346 | 9.1396377E-4 | 6.846238E-4  |
| A_24_P119002 | FAM98A         | 2.0386882 | 7.941301E-4  | 5.119335E-4  |
| A_23_P155197 | PTPLB          | 2.0273967 | 8.3580194E-4 | 5.687583E-4  |
| A_24_P941148 | HAUS6          | 2.0237284 | 3.1473604E-4 | 5.0342693E-5 |
| A_23_P135568 | TNIK           | 2.0205886 | 7.445827E-4  | 4.715125E-4  |
| A_24_P238878 | DDX24          | 2.0162005 | 3.1473604E-4 | 5.154704E-5  |
| A_24_P364296 | STX2           | 2.0050175 | 4.7304126E-4 | 1.7088217E-4 |
| A_32_P94866  | WWTR1          | 2.0020678 | 6.027562E-4  | 2.883344E-4  |
| A_24_P34632  | PTMA           | 1.9997072 | 2.449662E-4  | 3.4596596E-5 |
| A_24_P34476  | RIF1           | 1.9985168 | 4.878963E-4  | 1.8138511E-4 |
| A_24_P282172 | TRIP11         | 1.997051  | 0.0010964718 | 9.216358E-4  |
| A_23_P42036  | LYRM2          | 1.9958657 | 9.022291E-4  | 6.391646E-4  |
| A_23_P368718 | SPRYD7         | 1.9913327 | 1.5677472E-4 | 5.4117845E-6 |
| A_23_P149724 | NUCKS1         | 1.9913033 | 9.952111E-4  | 7.9118146E-4 |
| A_23_P500381 | HTR7           | 1.9891075 | 0.0013322701 | 0.001320131  |
| A_24_P366967 | FNBP1L         | 1.9873269 | 6.242166E-4  | 3.0713165E-4 |
| A_32_P119998 | Inc-TUBA1C-1   | 1.9847481 | 5.753532E-4  | 2.5028284E-4 |
| A_23_P411612 | SPRYD4         | 1.9634136 | 0.0013203182 | 0.0012661822 |
| A_24_P924389 | BZW1           | 1.9352142 | 0.0012089367 | 0.0010712446 |
| A_32_P98930  | LLPH           | 1.9330993 | 3.893024E-4  | 1.11736E-4   |
| A_23_P23151  | CEP170         | 1.9317206 | 0.0010188104 | 8.364487E-4  |
| A_24_P353486 | KLHL4          | 1.9311978 | 4.3390074E-4 | 1.4924604E-4 |
| A_23_P48387  | PDS5B          | 1.9296118 | 2.2253957E-4 | 2.639571E-5  |
| A_23_P162525 | UTP20          | 1.926327  | 5.753532E-4  | 2.581881E-4  |
| A_23_P116712 | RASSF8         | 1.9261725 | 3.530762E-4  | 9.007867E-5  |
| A_23_P357284 | GPR4           | 1.9200838 | 0.0012856561 | 0.001188956  |
| A_32_P1516   | SH3D19         | 1.9183143 | 8.7093835E-4 | 6.075519E-4  |

|              |               |           |              |               |
|--------------|---------------|-----------|--------------|---------------|
| A_24_P257108 | TANK          | 1.9036129 | 0.001164781  | 0.0010135452  |
| A_24_P103363 | FAM172A       | 1.9028964 | 4.956784E-4  | 1.8630282E-4  |
| A_24_P555473 | MARCH3        | 1.8995186 | 9.4853743E-4 | 7.3026965E-4  |
| A_23_P45140  | KRAS          | 1.8973005 | 3.7883423E-4 | 1.0362308E-4  |
| A_32_P109532 | Inc-FAM105B-1 | 1.8927816 | 5.753532E-4  | 2.5190256E-4  |
| A_24_P85169  | BTBD9         | 1.8925081 | 0.0012341314 | 0.0011076259  |
| A_32_P70468  | KDELR2        | 1.891439  | 4.0550015E-4 | 1.2550993E-4  |
| A_23_P146479 | SURF2         | 1.8850158 | 5.5608887E-4 | 2.2471794E-4  |
| A_32_P156136 | NAA16         | 1.882977  | 7.4082275E-4 | 4.6411128E-4  |
| A_23_P57413  | PPM1F         | 1.8828828 | 0.001164781  | 0.0010060185  |
| A_23_P46118  | CHML          | 1.8802104 | 9.6478104E-4 | 7.494085E-4   |
| A_23_P161156 | ZNF438        | 1.8785765 | 0.0010894343 | 9.108004E-4   |
| A_24_P927222 | RBM27         | 1.8757873 | 3.6397288E-4 | 9.5345975E-5  |
| A_24_P128524 | ICMT          | 1.8726373 | 7.0888264E-4 | 4.0207693E-4  |
| A_32_P80809  | ACAA2         | 1.8682969 | 4.1581242E-4 | 1.3449969E-4  |
| A_32_P57057  | USP15         | 1.8596199 | 4.204519E-4  | 1.3966844E-4  |
| A_24_P375453 | SSBP3         | 1.8592755 | 3.3914755E-4 | 7.725457E-5   |
| A_23_P113825 | NACC2         | 1.8564368 | 5.838708E-4  | 2.6467035E-4  |
| A_24_P213710 | AHI1          | 1.8538904 | 9.696446E-4  | 7.5760385E-4  |
| A_23_P217367 | ATG4A         | 1.8519431 | 0.0012781684 | 0.0011700689  |
| A_24_P405002 | PDIK1L        | 1.8383238 | 1.5677472E-4 | 6.071003E-6   |
| A_23_P82379  | CACNA2D1      | 1.8381224 | 5.8364077E-4 | 2.632366E-4   |
| A_24_P453740 | DNAJC21       | 1.8335056 | 5.753532E-4  | 2.5065636E-4  |
| A_23_P123974 | DTYMK         | 1.8323935 | 9.110757E-4  | 6.5157964E-4  |
| A_32_P326819 | KRR1          | 1.8315505 | 6.472328E-4  | 3.2499005E-4  |
| A_23_P18372  | B3GNT5        | 1.8306806 | 3.5055724E-4 | 8.304773E-5   |
| A_24_P791515 | SYNCRIP       | 1.8277539 | 7.400307E-4  | 4.4165843E-4  |
| A_23_P501080 | ZNF92         | 1.8238966 | 3.0712617E-4 | 4.687347E-5   |
| A_23_P23443  | EFHD2         | 1.8216723 | 6.242166E-4  | 3.067936E-4   |
| A_24_P161261 | SPDYE2        | 1.819119  | 1.9240817E-4 | 1.0849721E-5  |
| A_32_P63848  | OXCT1         | 1.8136392 | 8.3226775E-4 | 5.5579917E-4  |
| A_24_P196688 | CARD8         | 1.8126081 | 0.0013020994 | 0.0012220158  |
| A_24_P239664 | BCKDHB        | 1.8062713 | 0.0013435701 | 0.0013405095  |
| A_24_P827491 | PA2G4         | 1.8039593 | 1.9764541E-4 | 1.6658041E-5  |
| A_23_P78664  | DDX39A        | 1.8020912 | 9.7270566E-4 | 7.622113E-4   |
| A_32_P121303 | NUP50         | 1.8000201 | 4.204519E-4  | 1.3983138E-4  |
| A_32_P496952 | RBM43         | 1.79621   | 7.25094E-4   | 4.1858893E-4  |
| A_23_P421563 | LSM3          | 1.7946393 | 3.3914755E-4 | 7.020066E-5   |
| A_32_P9348   | Inc-TSC1-1    | 1.7937293 | 5.2286015E-4 | 2.0025708E-4  |
| A_32_P174713 | SRP72         | 1.7891335 | 2.449662E-4  | 3.4385906E-5  |
| A_23_P146997 | TXLNG         | 1.7841176 | 0.0012856561 | 0.0012000077  |
| A_24_P933503 | MON2          | 1.7824017 | 1.9521249E-4 | 1.5118962E-5  |
| A_32_P20904  | LOC102725275  | 1.7700454 | 9.1396377E-4 | 6.7343353E-4  |
| A_24_P16892  | TAF2          | 1.7632846 | 3.7883423E-4 | 1.04737264E-4 |
| A_23_P144999 | RAPGEF6       | 1.7628253 | 7.360307E-4  | 4.3759457E-4  |
| A_32_P101699 | LOC729887     | 1.7582382 | 9.696446E-4  | 7.5600756E-4  |
| A_23_P153084 | RALBP1        | 1.7578359 | 6.666522E-4  | 3.492711E-4   |
| A_23_P92281  | GTPBP8        | 1.7551967 | 2.4230906E-4 | 3.1442145E-5  |

|              |          |           |              |              |
|--------------|----------|-----------|--------------|--------------|
| A_23_P204090 | PTPN11   | 1.7521098 | 8.877035E-4  | 6.2483E-4    |
| A_32_P68050  | NEK1     | 1.7473773 | 3.3914755E-4 | 7.6256605E-5 |
| A_23_P153855 | ZNF492   | 1.7471088 | 6.083409E-4  | 2.9377738E-4 |
| A_32_P8402   | SYNCRIP  | 1.7466187 | 8.177051E-4  | 5.3644436E-4 |
| A_24_P205627 | TXLNA    | 1.7448064 | 0.0012551412 | 0.0011350594 |
| A_23_P41970  | AGGF1    | 1.7445552 | 5.753532E-4  | 2.4102253E-4 |
| A_24_P184692 | NKX2-1   | 1.7429115 | 8.3226775E-4 | 5.5844086E-4 |
| A_23_P82474  | TWISTNB  | 1.7406734 | 3.3680163E-4 | 6.242534E-5  |
| A_24_P653603 | C17orf89 | 1.7351823 | 2.0461227E-4 | 1.801082E-5  |
| A_23_P216080 | HOOK3    | 1.7329985 | 3.9035646E-4 | 1.171855E-4  |
| A_23_P348857 | CEP170   | 1.7253618 | 0.0012595624 | 0.0011447959 |
| A_23_P144726 | NOP16    | 1.7203113 | 0.0010188104 | 8.3137845E-4 |
| A_23_P160598 | TOE1     | 1.7142345 | 5.916913E-4  | 2.8095502E-4 |
| A_23_P406355 | FAM76B   | 1.7067972 | 7.988022E-4  | 5.1858457E-4 |
| A_23_P74799  | SLC25A24 | 1.7035702 | 0.0013246301 | 0.0012811148 |
| A_24_P177987 | DNAJC21  | 1.7021267 | 1.9240817E-4 | 8.418449E-6  |
| A_23_P330727 | PDDC1    | 1.7012873 | 3.3680163E-4 | 6.2910556E-5 |
| A_24_P380991 | RUFY2    | 1.7004983 | 7.973114E-4  | 5.1580055E-4 |
| A_24_P330009 | POLR2L   | 1.7000097 | 6.2580133E-4 | 3.0933687E-4 |
| A_24_P290481 | EZR      | 1.6998488 | 2.4230906E-4 | 3.2362423E-5 |
| A_23_P8763   | PTPN12   | 1.6997565 | 7.796705E-4  | 5.008362E-4  |
| A_24_P911259 | C1GALT1  | 1.6967083 | 8.3580194E-4 | 5.734466E-4  |
| A_23_P259771 | HEATR3   | 1.6896108 | 3.3914755E-4 | 7.653571E-5  |
| A_23_P33022  | POLR2L   | 1.6870428 | 2.4230906E-4 | 3.2781612E-5 |
| A_23_P213661 | PPIP5K2  | 1.683999  | 5.916913E-4  | 2.816736E-4  |
| A_23_P165840 | ODC1     | 1.6811627 | 9.1396377E-4 | 6.8443175E-4 |
| A_23_P98382  | TIMM8B   | 1.680723  | 9.1396377E-4 | 6.8495236E-4 |
| A_24_P165656 | PRKD3    | 1.6769959 | 1.9240817E-4 | 1.2272048E-5 |
| A_23_P132863 | LSM3     | 1.6739253 | 6.8069116E-4 | 3.6748018E-4 |
| A_23_P202361 | HPS1     | 1.6734138 | 7.007742E-4  | 3.9588154E-4 |
| A_24_P264207 | PTMA     | 1.6731312 | 1.5625464E-4 | 3.0455838E-6 |
| A_24_P41170  | PLEKHA5  | 1.6731274 | 5.179252E-4  | 1.9584416E-4 |
| A_23_P58466  | SMN1     | 1.6671002 | 0.0010089503 | 8.067006E-4  |
| A_24_P85283  | POLR3A   | 1.6660334 | 0.0010188104 | 8.242981E-4  |
| A_24_P942370 | GALNT4   | 1.6584125 | 7.678564E-4  | 4.914981E-4  |
| A_23_P218619 | MRPL30   | 1.6580487 | 6.6981174E-4 | 3.5611057E-4 |
| A_24_P145229 | CEP89    | 1.6498574 | 3.1473604E-4 | 5.125653E-5  |
| A_24_P29001  | LSM3     | 1.6342083 | 3.1496826E-4 | 5.5245004E-5 |
| A_24_P284213 | CASC4    | 1.6192081 | 2.4230906E-4 | 3.0250972E-5 |
| A_24_P941336 | TSR1     | 1.6165216 | 3.3914755E-4 | 6.939524E-5  |
| A_32_P143516 | FAM178A  | 1.6084676 | 5.753532E-4  | 2.509442E-4  |
| A_23_P114466 | TBL1Y    | 1.6059512 | 0.0012343524 | 0.0011119042 |
| A_24_P398092 | RAD23B   | 1.6030964 | 5.8406556E-4 | 2.6874998E-4 |
| A_23_P103631 | EBNA1BP2 | 1.5942426 | 0.0010479022 | 8.641015E-4  |
| A_24_P226116 | NAA15    | 1.5903966 | 0.0013040283 | 0.0012327374 |
| A_23_P165247 | DAZAP1   | 1.5888557 | 0.0011061478 | 9.3564397E-4 |
| A_32_P1509   | ZCCHC17  | 1.5885962 | 5.2286015E-4 | 2.032878E-4  |
| A_24_P224219 | EXOC5    | 1.5812374 | 7.4082275E-4 | 4.6522584E-4 |

|              |          |           |              |               |
|--------------|----------|-----------|--------------|---------------|
| A_23_P142918 | C2orf69  | 1.5796496 | 7.407433E-4  | 4.4545837E-4  |
| A_23_P401524 | COX6A2   | 1.5773636 | 0.0011703165 | 0.0010221717  |
| A_23_P116679 | PA2G4    | 1.5717243 | 0.0013305083 | 0.0013146807  |
| A_23_P65558  | MGAT2    | 1.5701958 | 9.1396377E-4 | 6.787451E-4   |
| A_23_P91769  | NDUFA6   | 1.5629529 | 0.0013246301 | 0.001278083   |
| A_24_P912818 | ANKRD50  | 1.5604343 | 0.0012103982 | 0.0010752968  |
| A_23_P90732  | PNKD     | 1.5588175 | 3.1690695E-4 | 5.7028814E-5  |
| A_24_P188071 | TUBA1C   | 1.5587763 | 0.0010188104 | 8.377917E-4   |
| A_32_P107797 | FAM133CP | 1.5541427 | 3.7883423E-4 | 1.0442723E-4  |
| A_24_P337504 | C5orf24  | 1.5508274 | 0.0010177682 | 8.1669755E-4  |
| A_23_P97473  | MRPL20   | 1.5404217 | 7.4082275E-4 | 4.5714376E-4  |
| A_23_P115955 | MRPL21   | 1.5392029 | 0.0013146335 | 0.0012466927  |
| A_24_P158065 | FAM133B  | 1.5383047 | 9.1396377E-4 | 6.813281E-4   |
| A_23_P126291 | SNRPE    | 1.5332049 | 2.1504618E-4 | 2.2338872E-5  |
| A_24_P144504 | BRCC3    | 1.5303979 | 0.0011061478 | 9.373279E-4   |
| A_24_P230965 | KIAA1586 | 1.5214591 | 3.7883423E-4 | 1.07868516E-4 |
| A_24_P288979 | GNPTAB   | 1.5178521 | 0.0013154031 | 0.0012584722  |
| A_24_P4705   | PPME1    | 1.5146358 | 9.110757E-4  | 6.5253937E-4  |
| A_23_P300770 | UBR1     | 1.5099536 | 0.0013534502 | 0.0013534502  |
| A_23_P46725  | EPC1     | 1.5085316 | 0.0013246301 | 0.0012838813  |

423

424

| ProbeName    | Gene Symbol    | FC (abs)  | p (Corr)     | p            |
|--------------|----------------|-----------|--------------|--------------|
| A_23_P128574 | ENOX1          | 7,480545  | 1.8134886E-4 | 5.4676344E-5 |
| A_23_P132115 | SIK1           | 6,473699  | 2.84636E-4   | 1.140676E-4  |
| A_23_P205164 | POU4F1         | 6,18772   | 1.0407757E-4 | 2.1244297E-5 |
| A_32_P232883 | LOC100507165   | 6,1080213 | 0.0011514068 | 0.0010072043 |
| A_24_P191312 | SLC1A4         | 5,6319747 | 8.889166E-4  | 6.8416615E-4 |
| A_23_P143673 | RASD2          | 5,597197  | 0.0010308647 | 8.4554066E-4 |
| A_32_P158376 | XLOC_I2_014504 | 5,449548  | 5.0709833E-4 | 2.972318E-4  |
| A_24_P348006 | RASD1          | 5,35677   | 0.0012274834 | 0.001149329  |
| A_24_P27627  | CHRNA1         | 5,3273754 | 0.001155831  | 0.0010400201 |
| A_24_P91780  | ADM2           | 4,775176  | 0.0010646742 | 8.8922225E-4 |
| A_23_P42065  | TNFRSF21       | 4,457057  | 3.1296673E-4 | 1.3245408E-4 |
| A_23_P200303 | HHLA3          | 4,2094502 | 2.4018642E-4 | 8.5459586E-5 |
| A_24_P221414 | DYNC111        | 3,7768717 | 7.7275874E-4 | 5.614801E-4  |
| A_24_P316439 | PLA2G4C        | 3,6613584 | 3.524967E-4  | 1.5983406E-4 |
| A_24_P241815 | JUNB           | 3,659653  | 6.161574E-5  | 7.893235E-6  |
| A_24_P100228 | XBP1           | 3,632505  | 3.358705E-5  | 2.1669705E-6 |
| A_23_P142506 | GADD45B        | 3,5963297 | 2.882939E-4  | 1.1607339E-4 |
| A_23_P114299 | CXCR3          | 3,595329  | 5.93987E-4   | 3.7100946E-4 |
| A_23_P52161  | NUAK2          | 3,5876007 | 5.1232695E-5 | 5.4686584E-6 |
| A_24_P166527 | TNFAIP3        | 3,5638201 | 1.9626711E-4 | 6.1746956E-5 |
| A_24_P66592  | CNKSR3         | 3,4225364 | 1.8628394E-4 | 5.6513105E-5 |
| A_32_P213330 | ARHGEF28       | 3,3868942 | 2.9441555E-5 | 1.4464405E-6 |
| A_24_P42446  | PURG           | 3,3492107 | 1.2230607E-4 | 2.748451E-5  |
| A_23_P6596   | HES1           | 3,2335005 | 2.0585267E-4 | 6.5854496E-5 |
| A_23_P128817 | PCK2           | 3,1930342 | 1.5264044E-4 | 3.9732247E-5 |
| A_24_P317604 | SLC37A3        | 3,1884117 | 8.708144E-7  | 1.6307385E-9 |
| A_23_P108314 | ADAMTS10       | 3,0990765 | 7.902579E-4  | 5.830742E-4  |
| A_23_P127107 | CLRN3          | 3,0985203 | 0.0012981272 | 0.001277676  |
| A_24_P381975 | TMEM231        | 3,0885332 | 2.772695E-5  | 1.0384625E-6 |
| A_24_P372134 | TMEM140        | 3,048863  | 3.1106852E-4 | 1.310682E-4  |
| A_32_P223059 | SLC45A1        | 2,9793122 | 4.3832755E-4 | 2.2983467E-4 |
| A_23_P51699  | ARHGEF2        | 2,9732327 | 2.1290686E-4 | 7.216506E-5  |
| A_24_P570049 | PPARA          | 2,973223  | 3.5280627E-4 | 1.6120735E-4 |
| A_24_P920795 | TMEM223        | 2,9566588 | 2.9441555E-5 | 1.3604681E-6 |
| A_23_P135769 | ACTB           | 2,9529712 | 8.836054E-5  | 1.3899411E-5 |
| A_23_P170246 | OCRL           | 2,9477766 | 2.5986159E-5 | 8.2731106E-7 |
| A_23_P412389 | FGF18          | 2,9228559 | 0.0010167885 | 8.301869E-4  |
| A_23_P214803 | SNAP91         | 2,9053795 | 5.9502886E-4 | 3.7440017E-4 |
| A_24_P417036 | PPARA          | 2,8909237 | 4.2198863E-4 | 2.1725702E-4 |
| A_23_P200960 | ERMAP          | 2,8625033 | 0.0010625293 | 8.849543E-4  |
| A_23_P201587 | SORT1          | 2,8618124 | 0.0011343106 | 9.817801E-4  |
| A_32_P97763  | PPP1R16B       | 2,8584619 | 8.5538055E-4 | 6.502158E-4  |
| A_32_P44316  | EEF1A1         | 2,8531308 | 4.4666097E-4 | 2.350407E-4  |
| A_24_P397043 | ST6GAL1        | 2,7776785 | 1.4589152E-4 | 3.7155893E-5 |



|              |          |           |               |               |
|--------------|----------|-----------|---------------|---------------|
| A_23_P384023 | GLIS3    | 2,765722  | 0.0010746553  | 9.014028E-4   |
| A_23_P217688 | TSC22D3  | 2,7627947 | 0.0010234225  | 8.375199E-4   |
| A_32_P117812 | LYSMD4   | 2,7577853 | 5.2895142E-5  | 6.169608E-6   |
| A_23_P158449 | SLC37A3  | 2,7506735 | 2.9441714E-4  | 1.19704506E-4 |
| A_24_P935125 | ZNF23    | 2,749866  | 3.524967E-4   | 1.6040579E-4  |
| A_24_P937915 | PRKCH    | 2,748175  | 2.8380298E-5  | 1.1160791E-6  |
| A_24_P272290 | PXDC1    | 2,7409985 | 1.5559593E-4  | 4.3415344E-5  |
| A_23_P37503  | MYO1E    | 2,7305424 | 7.3244964E-4  | 5.148376E-4   |
| A_23_P33511  | SCX      | 2,715189  | 0.0010055621  | 8.134885E-4   |
| A_23_P218884 | DVL3     | 2,6587474 | 1.730137E-4   | 5.0434282E-5  |
| A_24_P370946 | CYR61    | 2,639288  | 1.09559965E-4 | 2.297887E-5   |
| A_24_P185186 | SAMD14   | 2,6372857 | 5.913919E-4   | 3.654669E-4   |
| A_24_P682285 | HSPA1A   | 2,6331058 | 9.6326316E-5  | 1.637798E-5   |
| A_24_P372932 | PEX5     | 2,6207218 | 4.6099845E-5  | 4.316465E-6   |
| A_24_P291588 | DVL3     | 2,6051123 | 2.0218536E-4  | 6.39875E-5    |
| A_24_P147252 | ZNF23    | 2,59498   | 5.362388E-6   | 3.0125776E-8  |
| A_24_P144773 | RNF145   | 2,587716  | 9.642507E-4   | 7.63651E-4    |
| A_23_P385673 | RASA3    | 2,5801013 | 2.5986159E-5  | 8.286214E-7   |
| A_23_P131308 | CYP27A1  | 2,552509  | 3.7209535E-4  | 1.766002E-4   |
| A_23_P29830  | CBLB     | 2,5521953 | 6.161574E-5   | 7.961585E-6   |
| A_24_P933704 | PAM      | 2,5506768 | 1.730137E-4   | 5.0664894E-5  |
| A_23_P76823  | ADSSL1   | 2,5501926 | 0.0012229048  | 0.0011404618  |
| A_23_P373598 | MAFK     | 2,5319319 | 0.0010886859  | 9.2558697E-4  |
| A_32_P88120  | YPEL1    | 2,5253851 | 5.074653E-4   | 2.9839718E-4  |
| A_23_P4821   | JUNB     | 2,5148609 | 8.529834E-5   | 1.2778778E-5  |
| A_23_P256487 | CD274    | 2,5147448 | 5.4566876E-4  | 3.2801437E-4  |
| A_32_P407293 | PRR18    | 2,5076456 | 4.1923643E-4  | 2.0832616E-4  |
| A_23_P162238 | RAB5B    | 2,4972672 | 6.5583176E-6  | 4.9125976E-8  |
| A_24_P283535 | ARHGEF10 | 2,487203  | 3.9512955E-4  | 1.9047497E-4  |
| A_23_P66050  | B3GNT9   | 2,4779904 | 2.8468423E-5  | 1.1728564E-6  |
| A_24_P919330 | FTH1     | 2,47085   | 3.5454295E-4  | 1.6332878E-4  |
| A_23_P91859  | TRANK1   | 2,434512  | 0.0011082354  | 9.5295365E-4  |
| A_32_P827528 | S1PR2    | 2,4309022 | 2.918586E-4   | 1.1805516E-4  |
| A_23_P63521  | LCE2C    | 2,4298964 | 2.544333E-4   | 9.624631E-5   |
| A_24_P127292 | TTC7B    | 2,4225953 | 2.5986159E-5  | 6.679277E-7   |
| A_24_P124349 | PDGFD    | 2,4200475 | 4.2198863E-4  | 2.1731625E-4  |
| A_24_P925124 | MBD1     | 2,3989708 | 9.172234E-4   | 7.162587E-4   |
| A_24_P357465 | TP53INP2 | 2,3582149 | 0.0013554527  | 0.0013541079  |
| A_24_P201153 | TJP2     | 2,3556192 | 4.7269178E-4  | 2.6644237E-4  |
| A_23_P31046  | MYCT1    | 2,343127  | 1.9475345E-4  | 6.090604E-5   |
| A_24_P123616 | HSPA1A   | 2,3408558 | 1.8685451E-4  | 5.738603E-5   |
| A_24_P239988 | ITSN2    | 2,3102925 | 0.001155831   | 0.001033089   |
| A_24_P339071 | CDR2     | 2,3098276 | 1.9425509E-4  | 6.002264E-5   |
| A_23_P31177  | TMEM140  | 2,3083649 | 8.3549914E-4  | 6.2740664E-4  |
| A_23_P54918  | LDHD     | 2,3009398 | 7.8686344E-4  | 5.7467556E-4  |
| A_24_P131718 | RAB6B    | 2,2738302 | 2.77001E-4    | 1.0737679E-4  |
| A_24_P187993 | ELMO2    | 2,273759  | 9.6060525E-5  | 1.58302E-5    |
| A_24_P714134 | HNRNPKP3 | 2,2728374 | 5.6446162E-5  | 6.793196E-6   |

|              |              |           |               |               |
|--------------|--------------|-----------|---------------|---------------|
| A_24_P76210  | KANTR        | 2,269807  | 2.9441555E-5  | 1.3082043E-6  |
| A_23_P256735 | CPQ          | 2,2685854 | 2.562731E-4   | 9.742217E-5   |
| A_24_P192978 | KLHL35       | 2,268482  | 0.0012309954  | 0.0011594547  |
| A_32_P79610  | CLK2         | 2,2667768 | 9.7752294E-5  | 1.7207332E-5  |
| A_24_P252033 | SERAC1       | 2,2558038 | 5.181066E-4   | 3.056247E-4   |
| A_32_P144596 | TNKS         | 2,2518804 | 8.037247E-5   | 1.17397985E-5 |
| A_23_P66924  | DYM          | 2,2460222 | 2.1771486E-4  | 7.501785E-5   |
| A_24_P295609 | FUT4         | 2,245506  | 0.0012453897  | 0.0011879082  |
| A_23_P340728 | PSEN1        | 2,2381775 | 7.680253E-5   | 1.1074521E-5  |
| A_23_P3131   | NEK9         | 2,237839  | 1.4144073E-4  | 3.3615397E-5  |
| A_23_P158933 | GPR125       | 2,2367287 | 4.4563607E-5  | 4.0057175E-6  |
| A_23_P62881  | SGIP1        | 2,2289076 | 2.8070694E-4  | 1.1039037E-4  |
| A_23_P117782 | LARP6        | 2,2216334 | 6.8434596E-4  | 4.6466995E-4  |
| A_24_P413470 | TP73         | 2,2209978 | 6.8434596E-4  | 4.6329838E-4  |
| A_23_P73708  | ZNF75D       | 2,2185698 | 1.2230607E-4  | 2.7348466E-5  |
| A_24_P15702  | PANDAR       | 2,214858  | 1.0407757E-4  | 2.1206564E-5  |
| A_24_P211689 | CXorf38      | 2,2118044 | 0.0011343106  | 9.856182E-4   |
| A_23_P46690  | TMEM81       | 2,2117221 | 8.259023E-4   | 6.170579E-4   |
| A_24_P117902 | OSBPL10      | 2,2073464 | 4.2198863E-4  | 2.159314E-4   |
| A_24_P3761   | ALDH5A1      | 2,2063808 | 0.001155831   | 0.0010411137  |
| A_23_P154667 | FKBP1A       | 2,2024658 | 2.748125E-5   | 9.777973E-7   |
| A_32_P47701  | EEF1A1       | 2,2020783 | 2.5986159E-5  | 8.759379E-7   |
| A_23_P365719 | TAPBP        | 2,1929936 | 7.88132E-4    | 5.785538E-4   |
| A_24_P609382 | C17orf51     | 2,1892917 | 2.8070694E-4  | 1.0944429E-4  |
| A_24_P303815 | UHRF2        | 2,1834521 | 9.869043E-4   | 7.891538E-4   |
| A_23_P109034 | SDC4         | 2,1759357 | 0.0011343106  | 9.841473E-4   |
| A_24_P353740 | CTTNBP2NL    | 2,169488  | 1.150854E-5   | 1.336069E-7   |
| A_24_P341370 | PPP2R5C      | 2,1689076 | 2.8070694E-4  | 1.10134264E-4 |
| A_32_P146286 | LOC100130331 | 2,1642342 | 2.242643E-5   | 3.9371213E-7  |
| A_23_P201059 | UBQLN4       | 2,1603963 | 1.252297E-4   | 2.861053E-5   |
| A_24_P68649  | RNPEP        | 2,1593695 | 1.15066185E-4 | 2.478017E-5   |
| A_23_P127608 | TMPRSS4      | 2,159062  | 5.295438E-4   | 3.1336298E-4  |
| A_24_P140171 | CRTAP        | 2,1557136 | 3.8233335E-5  | 2.7352398E-6  |
| A_23_P75811  | SLC3A2       | 2,155438  | 1.5341557E-4  | 4.243902E-5   |
| A_23_P89621  | CBX4         | 2,1525052 | 1.00626814E-4 | 1.9421768E-5  |
| A_23_P148410 | FTHL17       | 2,1501806 | 0.0012309604  | 0.0011548898  |
| A_23_P356041 | SPAG9        | 2,1471229 | 8.5818104E-4  | 6.5568887E-4  |
| A_24_P11307  | AHCYL1       | 2,1416752 | 3.8233335E-5  | 2.6830671E-6  |
| A_23_P323094 | PHC1         | 2,13413   | 8.810803E-5   | 1.3694694E-5  |
| A_24_P378368 | MBTPS1       | 2,1284413 | 2.242643E-5   | 4.8637025E-7  |
| A_23_P169934 | RILPL1       | 2,1262994 | 6.8434596E-4  | 4.643462E-4   |
| A_23_P29422  | GYG1         | 2,1210048 | 3.025269E-4   | 1.2466975E-4  |
| A_23_P46964  | HIF1AN       | 2,1116934 | 2.1532048E-4  | 7.3789604E-5  |
| A_24_P255233 | RAMP2-AS1    | 2,111077  | 0.0010167885  | 8.290961E-4   |
| A_24_P121535 | ACTC1        | 2,1104715 | 1.0695218E-4  | 2.2231634E-5  |
| A_23_P33539  | ADCY2        | 2,1067557 | 3.358705E-5   | 2.1658486E-6  |
| A_23_P146576 | GBGT1        | 2,1022177 | 0.0011638909  | 0.0010549123  |
| A_23_P91640  | ASPHD2       | 2,101509  | 8.0215564E-4  | 5.94857E-4    |

|              |          |           |              |              |
|--------------|----------|-----------|--------------|--------------|
| A_23_P410998 | RAB5B    | 2,101338  | 1.0067404E-4 | 2.0048195E-5 |
| A_24_P12065  | CCNG2    | 2,095304  | 3.4757765E-4 | 1.5686557E-4 |
| A_24_P59220  | POTEF    | 2,0857255 | 2.9441555E-5 | 1.5097619E-6 |
| A_24_P162172 | SPG11    | 2,0766723 | 4.6855904E-4 | 2.59186E-4   |
| A_23_P379550 | YARS     | 2,0750136 | 1.4226987E-4 | 3.506023E-5  |
| A_23_P378722 | SAT1     | 2,0691595 | 0.0011960202 | 0.001104191  |
| A_23_P426944 | PAX9     | 2,062347  | 0.0012659018 | 0.0012161192 |
| A_24_P59278  | DSTYK    | 2,053165  | 4.2471953E-4 | 2.1951795E-4 |
| A_23_P390704 | STK38    | 2,0510254 | 5.743355E-5  | 7.206082E-6  |
| A_24_P23034  | ZNFX1    | 2,0502167 | 3.9567807E-4 | 1.9265224E-4 |
| A_23_P100011 | AP3S2    | 2,0495384 | 4.71301E-4   | 2.6301068E-4 |
| A_23_P213369 | KIAA0141 | 2,04376   | 1.2241534E-4 | 2.7738308E-5 |
| A_24_P179044 | SNX9     | 2,0424855 | 4.5774344E-4 | 2.4541953E-4 |
| A_24_P6903   | ACTBL2   | 2,0381093 | 2.2060401E-4 | 7.6426484E-5 |
| A_23_P209183 | COLGALT1 | 2,0339823 | 0.0012981272 | 0.0012786796 |
| A_23_P138826 | SYVN1    | 2,0213723 | 5.070476E-4  | 2.9532315E-4 |
| A_23_P386509 | GATAD2B  | 2,0175505 | 4.1923643E-4 | 2.126287E-4  |
| A_23_P210686 | ZCCHC3   | 2,0169592 | 9.6321554E-4 | 7.59389E-4   |
| A_24_P33077  | HOXB2    | 2,0165265 | 3.358705E-5  | 2.1800388E-6 |
| A_24_P390833 | MPPE1    | 2,010886  | 4.0847757E-5 | 3.2892387E-6 |
| A_23_P3819   | ZNF747   | 2,0089178 | 3.854821E-5  | 2.8937525E-6 |
| A_24_P18190  | HSPA5    | 2,0084343 | 1.0986148E-4 | 2.3247841E-5 |
| A_23_P39237  | ZFP36    | 2,007413  | 3.7209535E-4 | 1.769215E-4  |
| A_24_P125353 | CASC3    | 2,005098  | 1.4395443E-4 | 3.6123394E-5 |
| A_23_P143242 | CEBPB    | 2,0018227 | 0.0011739659 | 0.0010684408 |
| A_24_P328320 | GORASP2  | 1,9944365 | 7.6961285E-4 | 5.5775314E-4 |
| A_24_P276628 | PPT1     | 1,9934208 | 3.9512955E-4 | 1.9107388E-4 |
| A_23_P19437  | PPP1R11  | 1,9911178 | 4.6904717E-4 | 2.6087454E-4 |
| A_32_P231617 | TM4SF1   | 1,9853235 | 1.5313512E-4 | 4.1868403E-5 |
| A_23_P48246  | PEX5     | 1,9823297 | 9.6326316E-5 | 1.6071235E-5 |
| A_23_P255812 | SARAF    | 1,9813852 | 8.3549914E-4 | 6.2717666E-4 |
| A_24_P267522 | ZNF585A  | 1,980507  | 0.0013008508 | 0.0012837984 |
| A_23_P135271 | B4GALT1  | 1,97921   | 3.025269E-4  | 1.2631799E-4 |
| A_24_P17710  | KLHL5    | 1,9774275 | 4.1923643E-4 | 2.1256128E-4 |
| A_24_P190424 | RAB8A    | 1,9681767 | 4.736314E-5  | 4.700836E-6  |
| A_24_P54485  | CCDC115  | 1,9667315 | 1.7576655E-6 | 6.583017E-9  |
| A_24_P282031 | TXNDC11  | 1,9658815 | 9.412493E-5  | 1.5334961E-5 |
| A_23_P203505 | TRIM5    | 1,9647028 | 2.439342E-4  | 8.897012E-5  |
| A_23_P85888  | CLK2     | 1,961261  | 2.145522E-4  | 7.312453E-5  |
| A_23_P6474   | JOSD1    | 1,9583894 | 2.1218098E-5 | 3.1787414E-7 |
| A_23_P211227 | POFUT2   | 1,9569905 | 6.8434596E-4 | 4.6520148E-4 |
| A_24_P19662  | LRRC47   | 1,953327  | 2.8409224E-4 | 1.1278569E-4 |
| A_23_P435521 | TMEM106A | 1,9518306 | 0.0010625293 | 8.822837E-4  |
| A_23_P202510 | ASB13    | 1,9510617 | 7.09686E-4   | 4.89072E-4   |
| A_24_P73389  | STK24    | 1,9490496 | 5.2895142E-5 | 6.118398E-6  |
| A_24_P67027  | CLK2     | 1,9486781 | 2.6139963E-4 | 1.0035005E-4 |
| A_24_P172990 | AARS     | 1,948033  | 5.070476E-4  | 2.949432E-4  |
| A_24_P881527 | CTNND1   | 1,9453429 | 9.412493E-5  | 1.5315682E-5 |

|              |              |           |               |               |
|--------------|--------------|-----------|---------------|---------------|
| A_23_P162199 | PIP4K2C      | 1,9446573 | 1.7077866E-4  | 4.8930964E-5  |
| A_24_P247931 | FBXO25       | 1,9438905 | 3.364182E-4   | 1.4728234E-4  |
| A_23_P95330  | ZDHHC9       | 1,9421595 | 2.2627845E-4  | 7.881609E-5   |
| A_23_P34510  | PHC2         | 1,9383764 | 7.575678E-4   | 5.4313894E-4  |
| A_23_P84555  | KCTD21       | 1,9381267 | 1.00626814E-4 | 1.9455185E-5  |
| A_23_P130130 | BCL6B        | 1,9381082 | 8.995145E-4   | 6.973764E-4   |
| A_23_P69121  | SIAH2        | 1,9337629 | 1.7458819E-4  | 5.1984123E-5  |
| A_23_P54846  | HERPUD1      | 1,9336538 | 1.691365E-4   | 4.8143724E-5  |
| A_23_P202156 | NFKB2        | 1,9311929 | 0.0012347014  | 0.0011745848  |
| A_23_P25994  | LGMM         | 1,9297384 | 0.0010373783  | 8.52826E-4    |
| A_24_P50875  | ANKHD1       | 1,9289845 | 9.4145344E-4  | 7.38706E-4    |
| A_24_P93251  | EIF4B        | 1,9272127 | 7.863808E-4   | 5.728504E-4   |
| A_32_P122402 | LOC441455    | 1,9233975 | 4.985719E-5   | 5.135104E-6   |
| A_23_P51361  | TXLNA        | 1,9222863 | 5.2895142E-5  | 6.1918176E-6  |
| A_24_P597190 | CTD-2151A2.1 | 1,9213939 | 3.5690336E-4  | 1.6508451E-4  |
| A_24_P302332 | NECAP2       | 1,9206079 | 3.358705E-5   | 2.1285634E-6  |
| A_23_P86054  | WDTC1        | 1,9175134 | 0.0012889589  | 0.001255166   |
| A_23_P120899 | CSF2RB       | 1,9148889 | 8.90337E-4    | 6.8692665E-4  |
| A_23_P76743  | ASPG         | 1,9141457 | 0.0011514068  | 0.0010053529  |
| A_23_P14939  | TXNDC11      | 1,9118091 | 9.7752294E-5  | 1.6919745E-5  |
| A_23_P106174 | PSEN1        | 1,9107677 | 8.810803E-5   | 1.3540001E-5  |
| A_23_P113317 | P4HTM        | 1,9095345 | 6.706006E-5   | 8.916225E-6   |
| A_23_P435501 | SERINC3      | 1,9038092 | 1.150854E-5   | 1.5086101E-7  |
| A_23_P171054 | ELK1         | 1,8980042 | 1.5313512E-4  | 4.0909694E-5  |
| A_24_P401709 | CARKD        | 1,897275  | 3.358705E-5   | 2.135534E-6   |
| A_23_P121011 | CSRNP1       | 1,8964891 | 4.78697E-4    | 2.743332E-4   |
| A_32_P163169 | VDAC1        | 1,8947449 | 1.730137E-4   | 5.0412305E-5  |
| A_23_P216894 | MAPKAP1      | 1,8916736 | 2.5986159E-5  | 8.2539816E-7  |
| A_23_P128036 | MARS         | 1,8857995 | 2.9441714E-4  | 1.20672375E-4 |
| A_24_P173124 | FLCN         | 1,8837814 | 1.00626814E-4 | 1.924659E-5   |
| A_32_P214943 | PCBP2        | 1,8822386 | 4.719266E-5   | 4.5071642E-6  |
| A_23_P210521 | SLC2A10      | 1,8706542 | 4.7140807E-4  | 2.639532E-4   |
| A_23_P77228  | CRTC3        | 1,8694117 | 7.3244964E-4  | 5.1446835E-4  |
| A_23_P149281 | EPHA2        | 1,8687803 | 5.9502886E-4  | 3.7416347E-4  |
| A_32_P73775  | TP73-AS1     | 1,8676465 | 0.001086326   | 9.135973E-4   |
| A_24_P89843  | CYHR1        | 1,866512  | 0.0013215935  | 0.0013067442  |
| A_23_P205228 | ATP7B        | 1,8633057 | 4.7650153E-4  | 2.719754E-4   |
| A_23_P65442  | IRF9         | 1,8626542 | 0.0010625293  | 8.854411E-4   |
| A_23_P381976 | OGT          | 1,8612378 | 4.6556006E-4  | 2.5544775E-4  |
| A_24_P38930  | CTNND1       | 1,8569378 | 2.0585267E-4  | 6.674068E-5   |
| A_23_P155351 | BTD          | 1,848394  | 7.481299E-4   | 5.323771E-4   |
| A_23_P355455 | TBC1D5       | 1,8458713 | 4.6590838E-4  | 2.5651135E-4  |
| A_32_P41106  | CBR3-AS1     | 1,8416525 | 0.0010882126  | 9.231466E-4   |
| A_23_P12010  | RRNAD1       | 1,8405184 | 9.412493E-5   | 1.5077935E-5  |
| A_23_P161231 | SFXN3        | 1,8377266 | 1.4589152E-4  | 3.704822E-5   |
| A_24_P174257 | CCDC93       | 1,8372182 | 5.93987E-4    | 3.7045212E-4  |
| A_23_P367899 | EPOR         | 1,831957  | 9.424835E-4   | 7.4127916E-4  |
| A_23_P33482  | UVRAG        | 1,8308985 | 6.5420143E-4  | 4.2951186E-4  |

|              |          |           |               |              |
|--------------|----------|-----------|---------------|--------------|
| A_24_P276791 | LRRC42   | 1,8237276 | 1.9437674E-4  | 6.042423E-5  |
| A_23_P12950  | KBTBD4   | 1,8236737 | 4.2865184E-4  | 2.2296552E-4 |
| A_24_P316005 | RABGAP1L | 1,8235227 | 2.4302263E-4  | 8.783402E-5  |
| A_24_P63118  | PDCD6IP  | 1,8233502 | 0.0010167885  | 8.264517E-4  |
| A_23_P201086 | ARF1     | 1,822161  | 5.1232695E-5  | 5.449803E-6  |
| A_24_P73264  | DUSP16   | 1,8214103 | 4.1740912E-4  | 2.0524353E-4 |
| A_23_P107206 | STAT3    | 1,8211828 | 1.4144073E-4  | 3.3676984E-5 |
| A_24_P918436 | CSNK1E   | 1,8208351 | 8.7387016E-5  | 1.3255334E-5 |
| A_23_P210538 | ELMO2    | 1,81735   | 2.9441555E-5  | 1.4118847E-6 |
| A_23_P217054 | DCAF10   | 1,8169227 | 4.7269178E-4  | 2.6641073E-4 |
| A_23_P135437 | EXOC4    | 1,8168133 | 4.1923643E-4  | 2.0774643E-4 |
| A_23_P63243  | C1orf43  | 1,8159266 | 5.3944497E-4  | 3.2023233E-4 |
| A_24_P279172 | B3GNT9   | 1,8138117 | 3.9512955E-4  | 1.9164523E-4 |
| A_23_P159395 | AXIN2    | 1,8132423 | 0.0011514068  | 0.0010155666 |
| A_23_P98763  | LRTOMT   | 1,8103411 | 7.3244964E-4  | 5.1329803E-4 |
| A_23_P101319 | ZNF285   | 1,808693  | 5.838363E-4   | 3.5861105E-4 |
| A_32_P532216 | QARS     | 1,8073815 | 6.360587E-4   | 4.0974567E-4 |
| A_23_P64404  | FADS3    | 1,8053316 | 1.7389159E-4  | 5.145107E-5  |
| A_24_P612446 | C6orf89  | 1,8043545 | 1.867935E-4   | 5.7017493E-5 |
| A_23_P24709  | OSBP     | 1,8039817 | 4.0847757E-5  | 3.2783012E-6 |
| A_24_P82493  | DCAKD    | 1,8037784 | 2.3371313E-4  | 8.184336E-5  |
| A_23_P500905 | ZNF19    | 1,7983222 | 7.2878075E-4  | 5.058583E-4  |
| A_23_P205389 | MOAP1    | 1,7974913 | 3.4080376E-4  | 1.512556E-4  |
| A_24_P259490 | ARF1     | 1,7962564 | 2.242643E-5   | 5.039647E-7  |
| A_23_P407142 | LUZP1    | 1,791848  | 1.4787295E-4  | 3.821436E-5  |
| A_23_P60286  | EIF4B    | 1,7914662 | 0.0011960202  | 0.0011027604 |
| A_23_P359897 | KDM7A    | 1,7894821 | 7.3276693E-4  | 5.17328E-4   |
| A_23_P135499 | CLIC4    | 1,7894511 | 8.5538055E-4  | 6.5194734E-4 |
| A_24_P204358 | PYCR1    | 1,7888808 | 1.4226987E-4  | 3.516783E-5  |
| A_23_P204252 | M6PR     | 1,7887013 | 0.0012347014  | 0.0011744222 |
| A_23_P202307 | INPP5A   | 1,7863646 | 6.937952E-4   | 4.7292406E-4 |
| A_24_P28367  | COPA     | 1,7862245 | 5.2895142E-5  | 5.914017E-6  |
| A_32_P15421  | RNF185   | 1,7849314 | 4.6099845E-5  | 4.257851E-6  |
| A_24_P325107 | FAM160B1 | 1,7840331 | 1.00626814E-4 | 1.943422E-5  |
| A_23_P201963 | PARD3    | 1,7839646 | 7.545368E-4   | 5.383493E-4  |
| A_23_P143083 | TMEM214  | 1,7836808 | 1.730137E-4   | 5.0867322E-5 |
| A_32_P15320  | EEF1A1   | 1,7806364 | 4.418006E-5   | 3.7026607E-6 |
| A_23_P210969 | PHF20    | 1,7798828 | 4.430445E-5   | 3.816488E-6  |
| A_23_P409541 | POLR1D   | 1,7784699 | 2.0585267E-4  | 6.724103E-5  |
| A_23_P371787 | SUSD6    | 1,7782441 | 5.93987E-4    | 3.706902E-4  |
| A_23_P325631 | SKI      | 1,7731348 | 7.088077E-4   | 4.8449886E-4 |
| A_23_P89762  | PHLPP1   | 1,7731153 | 7.3244964E-4  | 5.1573233E-4 |
| A_32_P140706 | PMS2     | 1,7710453 | 1.4144073E-4  | 3.3143046E-5 |
| A_24_P345822 | TFG      | 1,7697573 | 3.8233335E-5  | 2.7923222E-6 |
| A_23_P91221  | PKIG     | 1,7696    | 2.439342E-4   | 8.90771E-5   |
| A_24_P164838 | SPATA2   | 1,7686787 | 4.3832755E-4  | 2.29112E-4   |
| A_23_P148015 | AXIN2    | 1,7681879 | 8.9683547E-4  | 6.9361995E-4 |
| A_24_P206758 | SNX15    | 1,7662151 | 1.4144073E-4  | 3.4384644E-5 |

|              |              |           |               |              |
|--------------|--------------|-----------|---------------|--------------|
| A_23_P128541 | TRAFD1       | 1,7655689 | 4.1923643E-4  | 2.1193392E-4 |
| A_24_P793483 | LOC101927733 | 1,764476  | 5.403187E-4   | 3.2176284E-4 |
| A_23_P41359  | ZNF330       | 1,7604369 | 1.0067404E-4  | 2.0172514E-5 |
| A_23_P213471 | LPCAT1       | 1,7593863 | 5.8410305E-4  | 3.5986872E-4 |
| A_24_P116805 | STAT3        | 1,7591088 | 0.001086326   | 9.1805076E-4 |
| A_23_P158239 | SHMT2        | 1,7589165 | 2.111384E-4   | 7.0774855E-5 |
| A_24_P272967 | AVL9         | 1,7585057 | 0.0012242155  | 0.0011439767 |
| A_32_P453321 | C1orf228     | 1,7572922 | 7.6961285E-4  | 5.569318E-4  |
| A_24_P15062  | ZNF490       | 1,7538105 | 0.0012759074  | 0.001233504  |
| A_24_P357056 | TANGO2       | 1,7525969 | 4.4563607E-5  | 3.972984E-6  |
| A_23_P46627  | ADIPOR1      | 1,7525086 | 1.5313512E-4  | 4.0498686E-5 |
| A_24_P218970 | EIF4B        | 1,7510335 | 6.5348606E-4  | 4.2709106E-4 |
| A_23_P26878  | NDEL1        | 1,7508434 | 5.741157E-5   | 7.0958117E-6 |
| A_23_P27040  | TMEM98       | 1,7455859 | 0.0011514068  | 0.0010150522 |
| A_23_P15299  | WBP2         | 1,7452306 | 4.7650153E-4  | 2.7215912E-4 |
| A_23_P205293 | EXD2         | 1,7434757 | 6.457898E-4   | 4.1722372E-4 |
| A_23_P151544 | DDX24        | 1,7426411 | 6.481439E-5   | 8.4962685E-6 |
| A_24_P198217 | SNX15        | 1,7399421 | 8.4486813E-4  | 6.3602434E-4 |
| A_23_P57877  | ALAS1        | 1,7390227 | 4.8251217E-4  | 2.783029E-4  |
| A_23_P139998 | UBAC2        | 1,7377554 | 6.5268413E-4  | 4.253447E-4  |
| A_24_P233960 | SNX27        | 1,7368815 | 6.9625E-5     | 9.525519E-6  |
| A_24_P928901 | SLC31A1      | 1,7362324 | 5.800326E-4   | 3.551885E-4  |
| A_23_P77440  | NFATC3       | 1,7359658 | 2.4777706E-4  | 9.187239E-5  |
| A_24_P929268 | TTBK2        | 1,7354251 | 5.4472644E-4  | 3.2642783E-4 |
| A_24_P393461 | C1orf43      | 1,7302809 | 5.730432E-4   | 3.4876223E-4 |
| A_32_P209624 | MKRN7P       | 1,7253661 | 3.3174988E-4  | 1.4350978E-4 |
| A_24_P210637 | CHST14       | 1,7241061 | 4.609739E-4   | 2.5206813E-4 |
| A_23_P92140  | MYD88        | 1,724     | 3.358705E-5   | 2.2308884E-6 |
| A_23_P257694 | GTF2IRD1     | 1,723422  | 0.0010905329  | 9.3124155E-4 |
| A_23_P213592 | RNF44        | 1,7229316 | 0.001155831   | 0.0010389157 |
| A_23_P3169   | GMPR2        | 1,7226045 | 3.025269E-4   | 1.2549618E-4 |
| A_24_P174550 | RHOA         | 1,7224958 | 2.4018642E-4  | 8.529574E-5  |
| A_23_P63010  | CERS2        | 1,7179711 | 1.00626814E-4 | 1.8681043E-5 |
| A_24_P337388 | MARCH6       | 1,7170619 | 5.2895142E-5  | 6.2404383E-6 |
| A_23_P251680 | COMT         | 1,7147019 | 2.7187477E-4  | 1.0488053E-4 |
| A_24_P252602 | NCS1         | 1,7106895 | 6.2147743E-4  | 3.9686105E-4 |
| A_24_P297166 | SEPT5        | 1,7102246 | 0.0012194351  | 0.0011349424 |
| A_24_P194730 | ZSCAN22      | 1,7071207 | 6.2048837E-4  | 3.950675E-4  |
| A_23_P348323 | PCGF2        | 1,7013506 | 4.609739E-4   | 2.5178058E-4 |
| A_32_P129950 | NHLRC3       | 1,6997452 | 9.772618E-4   | 7.796134E-4  |
| A_23_P331253 | XPNPEP1      | 1,6982361 | 2.6046645E-4  | 9.950404E-5  |
| A_24_P255338 | SEC24C       | 1,6971636 | 3.358705E-5   | 2.2642955E-6 |
| A_24_P263595 | SNX29P2      | 1,6970246 | 6.6594424E-4  | 4.4146867E-4 |
| A_24_P172304 | ADAMTS13     | 1,6958613 | 4.8805727E-4  | 2.8241516E-4 |
| A_24_P370670 | ZMYM6NB      | 1,6954207 | 2.0585267E-4  | 6.784657E-5  |
| A_23_P385081 | SCAMP2       | 1,6907806 | 4.1923643E-4  | 2.1194322E-4 |
| A_23_P81399  | SQSTM1       | 1,6903305 | 0.0011082354  | 9.5531804E-4 |
| A_23_P66715  | PIGS         | 1,6886516 | 2.0585267E-4  | 6.602475E-5  |

|              |          |           |               |              |
|--------------|----------|-----------|---------------|--------------|
| A_23_P114172 | TBC1D8B  | 1,6873515 | 2.8202668E-4  | 1.1143751E-4 |
| A_24_P376322 | MBD1     | 1,6855065 | 4.5697458E-4  | 2.4389093E-4 |
| A_23_P26810  | TP53     | 1,6851417 | 8.0145587E-4  | 5.928372E-4  |
| A_23_P419277 | MARCH8   | 1,68392   | 0.0012309954  | 0.0011612904 |
| A_23_P23421  | ARHGEF11 | 1,6836736 | 4.1740912E-4  | 2.055779E-4  |
| A_23_P78383  | C18orf8  | 1,6834366 | 1.00626814E-4 | 1.9576491E-5 |
| A_23_P84922  | HDAC8    | 1,6822225 | 1.0589791E-4  | 2.1814176E-5 |
| A_23_P428835 | PHF20    | 1,6804863 | 6.9625E-5     | 9.444901E-6  |
| A_24_P207479 | DEDD2    | 1,6793576 | 0.0011514068  | 0.0010112457 |
| A_23_P117506 | DHRS7    | 1,6789476 | 0.0011960202  | 0.0010987946 |
| A_24_P940537 | STK35    | 1,678886  | 3.6444032E-4  | 1.6935471E-4 |
| A_23_P200767 | TROVE2   | 1,6779115 | 4.5377194E-4  | 2.4048213E-4 |
| A_24_P39508  | CMTM3    | 1,6774877 | 4.7650153E-4  | 2.7082366E-4 |
| A_23_P99186  | UBE3B    | 1,6772497 | 9.3625684E-4  | 7.328752E-4  |
| A_32_P22338  | PDCD6IP  | 1,6752517 | 0.0012903799  | 0.0012613826 |
| A_23_P305938 | ZNF75D   | 1,67313   | 4.609739E-4   | 2.513074E-4  |
| A_24_P69654  | KLF6     | 1,6703315 | 3.4125536E-4  | 1.5209509E-4 |
| A_24_P163405 | TRIM27   | 1,6693412 | 1.6042136E-4  | 4.5178367E-5 |
| A_24_P28845  | ZNF2     | 1,6690451 | 6.8434596E-4  | 4.6272494E-4 |
| A_23_P206474 | TRAF7    | 1,6671985 | 4.78697E-4    | 2.7520597E-4 |
| A_32_P70220  | CHMP7    | 1,667083  | 2.1183983E-4  | 7.1406685E-5 |
| A_24_P74981  | KDM1A    | 1,6612755 | 2.3801083E-4  | 8.3794075E-5 |
| A_23_P140050 | SUPT20H  | 1,6586076 | 2.9441555E-5  | 1.543752E-6  |
| A_24_P298013 | GTPBP2   | 1,6584241 | 4.7650153E-4  | 2.7072616E-4 |
| A_23_P4913   | KDELR1   | 1,6581595 | 2.0585267E-4  | 6.6583605E-5 |
| A_24_P205213 | ARSB     | 1,6573284 | 0.0013549939  | 0.0013473816 |
| A_23_P73593  | MSN      | 1,656895  | 4.2865184E-4  | 2.2315583E-4 |
| A_23_P76515  | CERS5    | 1,6552289 | 0.001155831   | 0.0010256722 |
| A_23_P424513 | RANBP9   | 1,6543504 | 3.364182E-4   | 1.4741921E-4 |
| A_23_P137403 | LRRC41   | 1,6540321 | 3.2326084E-4  | 1.3862684E-4 |
| A_24_P80633  | CTNNA1   | 1,6518188 | 5.779992E-4   | 3.5286095E-4 |
| A_32_P531428 | VMAC     | 1,6468189 | 9.7645127E-4  | 7.7713816E-4 |
| A_24_P159312 | SLC7A6   | 1,6463554 | 0.001155831   | 0.0010292409 |
| A_24_P382724 | TUG1     | 1,6453303 | 3.144604E-4   | 1.3367512E-4 |
| A_23_P396541 | TADA2B   | 1,6435994 | 1.00626814E-4 | 1.9597732E-5 |
| A_24_P11965  | MRFAP1   | 1,6428521 | 9.7920136E-5  | 1.7576058E-5 |
| A_24_P453259 | ATF6     | 1,642352  | 0.0010905329  | 9.3079807E-4 |
| A_24_P916141 | DCAF7    | 1,6416059 | 4.1740912E-4  | 2.055445E-4  |
| A_23_P111865 | ZSCAN21  | 1,6396899 | 0.001155831   | 0.0010378966 |
| A_23_P166193 | EDEM2    | 1,6390388 | 3.5323558E-4  | 1.6206501E-4 |
| A_24_P328819 | TRAPPC11 | 1,6368743 | 1.10848516E-4 | 2.366429E-5  |
| A_23_P210995 | OSBPL2   | 1,6366693 | 3.676868E-4   | 1.7282656E-4 |
| A_23_P2692   | COG3     | 1,6354042 | 3.4359135E-4  | 1.5442308E-4 |
| A_24_P320526 | C6orf106 | 1,6350344 | 9.897869E-4   | 7.9516595E-4 |
| A_24_P39759  | RNF135   | 1,6343216 | 1.471672E-4   | 3.7756377E-5 |
| A_24_P65121  | TTC23    | 1,6288732 | 0.0010746553  | 9.015835E-4  |
| A_24_P341019 | TMEM230  | 1,6281607 | 0.0013554527  | 0.0013534412 |
| A_24_P362394 | VPS45    | 1,625835  | 0.0012546513  | 0.001200612  |

|              |              |           |              |              |
|--------------|--------------|-----------|--------------|--------------|
| A_24_P484797 | CIDPCP       | 1,6256526 | 0.001261567  | 0.0012095923 |
| A_24_P40594  | HOMEZ        | 1,6244389 | 6.7227555E-4 | 4.4718845E-4 |
| A_23_P213000 | WDR1         | 1,6236742 | 4.6855904E-4 | 2.597256E-4  |
| A_23_P251767 | BANP         | 1,6205798 | 6.287135E-4  | 4.0265924E-4 |
| A_23_P4007   | FXR2         | 1,6188549 | 0.0013554527 | 0.0013554527 |
| A_24_P307626 | ATP1A4       | 1,6187612 | 0.0010380717 | 8.592279E-4  |
| A_23_P84256  | MAP2K5       | 1,6174879 | 0.0012981272 | 0.0012753889 |
| A_23_P204702 | TMBIM6       | 1,616638  | 0.0011960202 | 0.0011034444 |
| A_24_P71021  | GNB1         | 1,6153026 | 4.609739E-4  | 2.5140305E-4 |
| A_23_P166135 | XRN2         | 1,6116837 | 1.1580153E-4 | 2.5155388E-5 |
| A_32_P188178 | TRIP12       | 1,6113429 | 7.2878075E-4 | 5.063252E-4  |
| A_32_P27046  | CHGA         | 1,6107023 | 0.0012759074 | 0.0012320913 |
| A_24_P193570 | CNOT1        | 1,6100684 | 1.5313512E-4 | 4.171557E-5  |
| A_24_P92640  | LOC100128288 | 1,6096517 | 0.0012871044 | 0.0012485395 |
| A_23_P111188 | ZBTB22       | 1,6079589 | 8.9960964E-4 | 6.9913483E-4 |
| A_23_P258931 | ZNF623       | 1,6079545 | 0.001086326  | 9.195119E-4  |
| A_24_P70993  | CD99         | 1,6068523 | 0.001155831  | 0.0010337102 |
| A_24_P410363 | EGLN1        | 1,6043928 | 0.0013486039 | 0.0013385019 |
| A_23_P27334  | ZBTB14       | 1,6037934 | 9.923554E-4  | 7.990877E-4  |
| A_23_P154786 | MAP1LC3A     | 1,6032311 | 5.7062594E-4 | 3.4419796E-4 |
| A_24_P103922 | CTBP2        | 1,6031243 | 2.111384E-4  | 7.06638E-5   |
| A_23_P205255 | WDR20        | 1,5993565 | 2.4302263E-4 | 8.7595676E-5 |
| A_24_P98249  | TACC1        | 1,5993267 | 3.4080376E-4 | 1.5070927E-4 |
| A_23_P142776 | EIF3F        | 1,5991976 | 7.902579E-4  | 5.8221014E-4 |
| A_23_P205296 | EXD2         | 1,5984857 | 0.0010380717 | 8.573378E-4  |
| A_23_P153783 | USF2         | 1,5983433 | 8.529834E-5  | 1.2628166E-5 |
| A_23_P37897  | C16orf62     | 1,5976621 | 2.4777706E-4 | 9.161819E-5  |
| A_23_P20248  | MAP2K1       | 1,5976027 | 9.951883E-4  | 8.032324E-4  |
| A_24_P378788 | SLC35E1      | 1,5966094 | 2.9441714E-4 | 1.2074411E-4 |
| A_23_P84565  | POLR3D       | 1,5950434 | 8.5538055E-4 | 6.510192E-4  |
| A_23_P12849  | FBXO18       | 1,5925415 | 1.2542967E-4 | 2.8891103E-5 |
| A_23_P207620 | ANKFY1       | 1,5922011 | 1.5313512E-4 | 4.115837E-5  |
| A_23_P137715 | POGK         | 1,590145  | 7.09686E-4   | 4.887258E-4  |
| A_23_P35343  | ZNF248       | 1,5880202 | 0.0012309954 | 0.0011631169 |
| A_23_P152272 | RNPS1        | 1,5870935 | 0.0012453897 | 0.0011894171 |
| A_24_P206047 | SLC25A4      | 1,5864114 | 0.001016408  | 8.24166E-4   |
| A_24_P120827 | HGSNAT       | 1,5849605 | 2.4819013E-4 | 9.295511E-5  |
| A_23_P24193  | XPNPEP1      | 1,5816466 | 1.4144073E-4 | 3.443314E-5  |
| A_23_P407012 | CSF1         | 1,5784163 | 4.609739E-4  | 2.519989E-4  |
| A_24_P766577 | RNPS1        | 1,5782063 | 0.0011638909 | 0.0010535709 |
| A_24_P143758 | TPT1-AS1     | 1,5771393 | 9.7645127E-4 | 7.7703584E-4 |
| A_23_P120442 | NCOA3        | 1,5763634 | 6.6441024E-4 | 4.3920754E-4 |
| A_23_P416242 | RNF166       | 1,5759966 | 8.539912E-4  | 6.4449146E-4 |
| A_23_P80156  | PRMT2        | 1,5723153 | 5.987173E-4  | 3.7904747E-4 |
| A_24_P49349  | RABGAP1L     | 1,5699321 | 0.0011880514 | 0.0010857099 |
| A_23_P133799 | KLC4         | 1,5693338 | 0.0011863862 | 0.0010819664 |
| A_23_P37076  | BAG5         | 1,5678136 | 2.4777706E-4 | 9.164485E-5  |
| A_23_P129704 | TERF2IP      | 1,5670497 | 9.7752294E-5 | 1.7058957E-5 |



|              |          |           |              |              |
|--------------|----------|-----------|--------------|--------------|
| A_24_P185347 | MBD1     | 1,5661194 | 3.650401E-4  | 1.7089891E-4 |
| A_23_P402952 | CTAGE15  | 1,5641209 | 3.4034465E-4 | 1.4977714E-4 |
| A_23_P94636  | RC3H2    | 1,5633167 | 3.6444032E-4 | 1.6993565E-4 |
| A_24_P194755 | MUM1     | 1,5613483 | 0.0011960202 | 0.0010997667 |
| A_23_P113311 | P4HTM    | 1,560372  | 0.0012085402 | 0.001120276  |
| A_23_P144054 | PRKCD    | 1,5591323 | 8.5538055E-4 | 6.509517E-4  |
| A_24_P692198 | GOT2     | 1,5582899 | 3.8892985E-4 | 1.8645327E-4 |
| A_24_P394368 | WDR19    | 1,5576041 | 6.4699404E-4 | 4.1921338E-4 |
| A_24_P79755  | AKR1A1   | 1,555571  | 8.1277266E-4 | 6.0425233E-4 |
| A_32_P169574 | OTUD5    | 1,5552272 | 5.987173E-4  | 3.7820358E-4 |
| A_23_P29036  | IFNGR2   | 1,5533623 | 7.6622394E-4 | 5.524274E-4  |
| A_23_P8416   | GALNT11  | 1,5530868 | 1.5266582E-4 | 4.0024745E-5 |
| A_23_P39813  | TTC31    | 1,5501318 | 3.1874437E-4 | 1.360931E-4  |
| A_24_P373312 | NFATC3   | 1,5497417 | 0.0010380717 | 8.565439E-4  |
| A_23_P71821  | PBX3     | 1,5478382 | 8.813992E-4  | 6.767297E-4  |
| A_24_P364363 | TNFRSF1A | 1,5468543 | 9.897869E-4  | 7.948902E-4  |
| A_23_P501339 | CDIPT    | 1,5462148 | 0.001098584  | 9.40174E-4   |
| A_32_P144708 | CTBP2    | 1,5448623 | 3.364182E-4  | 1.4659186E-4 |
| A_24_P202139 | METTL9   | 1,5424166 | 0.0012759074 | 0.0012352886 |
| A_24_P415601 | RNH1     | 1,5415772 | 0.0013374251 | 0.0013249024 |
| A_24_P226554 | ACTB     | 1,5410713 | 6.5420143E-4 | 4.3049938E-4 |
| A_24_P402106 | ANKMY1   | 1,5359099 | 6.729901E-4  | 4.5118062E-4 |
| A_23_P57643  | TPRA1    | 1,5342983 | 0.0011460055 | 9.979261E-4  |
| A_24_P62237  | CERK     | 1,5307102 | 4.2198863E-4 | 2.163273E-4  |
| A_23_P436117 | HMG20A   | 1,5301838 | 5.7062594E-4 | 3.4571625E-4 |
| A_23_P100103 | VPS39    | 1,5294685 | 6.9625E-5    | 9.648408E-6  |
| A_24_P243278 | DAP      | 1,5283608 | 4.5521953E-4 | 2.4210177E-4 |
| A_23_P77562  | TMEM219  | 1,5272815 | 5.433107E-4  | 3.2456202E-4 |
| A_23_P151653 | APEX1    | 1,5211177 | 0.0011082354 | 9.5673505E-4 |
| A_23_P88817  | MLYCD    | 1,5206157 | 8.259023E-4  | 6.1710674E-4 |
| A_32_P64570  | KANK1    | 1,520615  | 0.0011673791 | 0.00106026   |
| A_24_P305223 | CTAGE1   | 1,5202446 | 0.001288372  | 0.0012521817 |
| A_24_P186174 | PPP6R2   | 1,5201818 | 7.634478E-4  | 5.4899615E-4 |
| A_23_P100795 | STAT3    | 1,520116  | 0.0012194351 | 0.0011339874 |
| A_23_P208265 | RPS5     | 1,5186596 | 0.001155831  | 0.0010292566 |
| A_32_P447539 | HMCN1    | 1,5179182 | 3.7209535E-4 | 1.7698918E-4 |
| A_24_P369154 | PPP6C    | 1,5162009 | 2.4179059E-4 | 8.648315E-5  |
| A_24_P171345 | PUM1     | 1,5153754 | 8.7635155E-4 | 6.712131E-4  |
| A_24_P849801 | RPL22    | 1,5124099 | 7.575678E-4  | 5.433492E-4  |
| A_23_P131176 | TMEM185B | 1,5108728 | 6.5268413E-4 | 4.2432538E-4 |
| A_23_P75749  | GLYAT    | 1,5098917 | 0.001155831  | 0.0010326097 |
| A_24_P24092  | ZNF181   | 1,5067663 | 4.517699E-4  | 2.3857513E-4 |
| A_24_P63727  | STK38    | 1,5059849 | 0.0012085402 | 0.0011201852 |
| A_23_P303203 | CHMP7    | 1,5045445 | 9.0319983E-4 | 7.0361636E-4 |
| A_23_P140602 | NGRN     | 1,5036159 | 0.0011561047 | 0.0010435253 |
| A_23_P29517  | TFG      | 1,503106  | 7.34337E-5   | 1.0313722E-5 |
| A_24_P201531 | ARCN1    | 1,5026165 | 7.2892924E-4 | 5.077934E-4  |
| A_24_P238744 | POTEM    | 1,5001304 | 7.088077E-4  | 4.8581202E-4 |

428 **Table S4:** Gene ontology analysis for classification of the genes upregulated in PT based  
 429 on the biological process

| GO ID | GO Term                      | Count | p-Value | Genes                                                                                                                                     | Fold Enrichment |
|-------|------------------------------|-------|---------|-------------------------------------------------------------------------------------------------------------------------------------------|-----------------|
| 46835 | carbohydrate phosphorylation | 3     | 0.0031  | GCK, GNPTAB, HK2                                                                                                                          | 34.51           |
| 6887  | exocytosis                   | 6     | 0.0081  | STX2, NLGN1, CRCP, EXOC5, TXLNA, RAB27A                                                                                                   | 4.80            |
| 33554 | cellular response to stress  | 14    | 0.0082  | RAD23B, BRCC3, TNIK, NEK1, SMC5, CHEK1, PTPN11, LOC100133315, FANCM, DHRS2, RIF1, BAX, POLQ, MAP2K6                                       | 2.27            |
| 16192 | vesicle-mediated transport   | 14    | 0.0094  | KDEL2, STX2, NLGN1, CRCP, TXLNA, MON2, MARCH3, HOOK3, KRAS, FNBP1L, MCFD2, EXOC5, SH3D19, RAB27A                                          | 2.23            |
| 8104  | protein localization         | 21    | 0.0012  | KDEL2, STX2, NLGN1, ICMT, MON2, TIMM8B, HOOK3, EZR, CHML, GNPTAB, ANK3, ATG4A, BAX, MCFD2, NUP50, SRP72, EXOC5, NUP35, PEX10, NSF, RAB27A | 2.19            |
| 7049  | cell cycle                   | 18    | 0.0042  | TAF2, CKAP2, HAUS6, PDS5B, LIN9, DBF4, NEK1, DTYMK, E2F8, CHEK1, EML4, PA2G4, RIF1, SEPT7P2, NCAPG2, ZWILCH, ASPM, MAP2K6                 | 2.13            |

430

431

**Table S5:** Gene ontology analysis for classification of the genes downregulated in PT based on the biological process

| GO ID | GO Term                                            | Count | p-Value  | Genes                                                                                                                                                                                                                                              | Fold Enrichment |
|-------|----------------------------------------------------|-------|----------|----------------------------------------------------------------------------------------------------------------------------------------------------------------------------------------------------------------------------------------------------|-----------------|
| 6890  | retrograde vesicle-mediated transport, Golgi to ER | 6     | 0.0001   | COG3, COPA, ARF1, ARCN1, RAB6B, TAPBP                                                                                                                                                                                                              | 12.8            |
| 6901  | vesicle coating                                    | 4     | 0.0041   | COPA, SNAP91, ARF1, ARCN1                                                                                                                                                                                                                          | 11.95           |
| 51650 | establishment of vesicle localization              | 5     | 0.0059   | COPA, ARF1, PSEN1, MAP2K1, ARCN1                                                                                                                                                                                                                   | 6.79            |
| 34976 | response to endoplasmic reticulum stress           | 5     | 0.0066   | ATF6, HERPUD1, AARS, TP53, HSPA5                                                                                                                                                                                                                   | 6.59            |
| 31669 | cellular response to nutrient levels               | 6     | 0.0028   | PSEN1, MAP1LC3A, NUAK2, TP53, HSPA5, USF2                                                                                                                                                                                                          | 6.11            |
| 16050 | vesicle organization                               | 6     | 0.0058   | COPA, RAB8A, SNAP91, ARF1, ARCN1, SORT1                                                                                                                                                                                                            | 5.17            |
| 6401  | RNA catabolic process                              | 7     | 0.0032   | ZFP36, RNH1, RNPS1, HSPA1A, CASC3, DEDD2, XRN2                                                                                                                                                                                                     | 4.82            |
| 51098 | regulation of binding                              | 10    | 0.0072   | KDM1A, MYD88, PSEN1, NCOA3, SKI, TNKS, FKBP1A, EGLN1, APEX1, PRKCD                                                                                                                                                                                 | 2.93            |
| 1701  | in utero embryonic development                     | 11    | 0.0061   | HES1, KDM1A, WDTC1, PCGF2, CEBPB, SYVN1, NDEL1, MYO1E, TP53, EGLN1, JUNB                                                                                                                                                                           | 2.8             |
| 46907 | intracellular transport                            | 35    | 0.000004 | ARSB, COPA, SNX9, SNX15, CHMP7, AP3S2, PEX5, FTH1, TAPBP, WDR19, SQSTM1, DUSP16, EXOC4, PUM1, RAB6B, SEC24C, KDELR1, DYNC111, ARHGEF2, RAB8A, ACTC1, SCAMP2, MAP2K1, VPS45, MYO1E, TP53, M6PR, COG3, CBLB, NDEL1, PSEN1, ARF1, ARCN1, SORT1, ATP7B | 2.39            |
| 60548 | negative regulation of cell death                  | 19    | 0.0012   | CEBPB, SYVN1, SLC25A4, NUAK2, TMBIM6, AARS, TP53, CBX4, HSPA1A, PPT1, TP73, PCGF2, MYD88, PSEN1, SQSTM1, RHOA, SORT1, HSPA5, TNFAIP3                                                                                                               | 2.36            |
| 70727 | cellular macromolecule localization                | 20    | 0.0024   | SNX9, COPA, ARHGEF2, SNX15, VPS45, AP3S2, TP53, PEX5, TERF2IP, CASC3, COG3, CBLB,                                                                                                                                                                  | 2.16            |

|       |                                                     |    |         |                                                                                                                                                                                                            |      |
|-------|-----------------------------------------------------|----|---------|------------------------------------------------------------------------------------------------------------------------------------------------------------------------------------------------------------|------|
|       |                                                     |    |         | WDR19, DUSP16, ARCN1, EXOC4, SORT1, TNKS, SEC24C, KDELR1                                                                                                                                                   |      |
| 45892 | negative regulation of transcription, DNA-dependent | 17 | 0.0062  | PPARA, GLIS3, WDTC1, CTBP2, PKIG, TP53, TRIM27, CBX4, SKI, STAT3, HES1, KDM1A, PCGF2, BCL6B, SIK1, HDAC8, RASD1                                                                                            | 2.14 |
| 16192 | vesicle-mediated transport                          | 27 | 0.0005  | COPA, SNAP91, CHMP7, AP3S2, PPT1, TXLNA, ITSN2, FTH1, TAPBP, WDR19, SQSTM1, NECAP2, EXOC4, PUM1, RAB6B, SEC24C, KDELR1, RAB8A, SCAMP2, VPS45, M6PR, ELMO2, COG3, PSEN1, ARF1, ARCN1, SORT1                 | 2.1  |
| 34613 | cellular protein localization                       | 19 | 0.0049  | SNX9, COPA, ARHGEF2, SNX15, VPS45, AP3S2, TP53, PEX5, TERF2IP, COG3, CBLB, WDR19, DUSP16, ARCN1, EXOC4, SORT1, TNKS, SEC24C, KDELR1                                                                        | 2.07 |
| 51254 | positive regulation of RNA metabolic process        | 22 | 0.0026  | KLF6, PPARA, DVL3, GLIS3, CEBPB, MAP2K1, TP53, ELK1, USF2, JUNB, TP73, STAT3, ARHGEF11, HES1, ATF6, TNFRSF1A, NCOA3, PAX9, ZSCAN21, SQSTM1, CSRNP1, NFATC3                                                 | 2.05 |
| 6915  | apoptosis                                           | 27 | 0.00010 | PHLPP1, TNFRSF21, NUA2, PPT1, BAG5, TNFRSF1A, MOAP1, TSC22D3, SQSTM1, DAP, TRAF7, DEDD2, ARHGEF2, YARS, ACTC1, TMBIM6, TP53, ELMO2, TP73, ARHGEF11, VDAC1, PSEN1, CSRNP1, PDCD6IP, SIAH2, TNFAIP3, GADD45B | 2.01 |

435

436

437 **Table S6:** Enriched biological pathways captured by all differentially expressed genes in  
 438 PT-ECFCs based on Genespring Pathways database: WikiPathway, KEGG. Pathways  
 439 with enrichment p-value  $\leq 0.01$  are shown here. Pathways involving MAPK pathways  
 440 modulation are highlighted in bold.

| WikiPathway                                                                           | Count     | p-value            |
|---------------------------------------------------------------------------------------|-----------|--------------------|
| Hs_miR-targeted_genes_in_lymphocytes_-_TarBase_WP2004_82897                           | 28        | 3,69E-07           |
| Hs_Lymphocyte_TarBase_WP2004_46264                                                    | 28        | 5,46E-07           |
| Hs_miR-targeted_genes_in_muscle_cell_-_TarBase_WP2005_82898                           | 24        | 1,02E-06           |
| Hs_Oncostatin_M_Signaling_Pathway_WP2374_54197                                        | 10        | 1,80E-06           |
| Hs_Muscle_cell_TarBase_WP2005_44926                                                   | 23        | 3,85E-06           |
| Hs_miR-targeted_genes_in_epithelium_-_TarBase_WP2002_82943                            | 19        | 1,90E-05           |
| Hs_Epithelium_TarBase_WP2002_45243                                                    | 19        | 2,45E-05           |
| Hs_trans-Golgi_Network_Vesicle_Budding_WP3578_83468                                   | 9         | 2,70E-05           |
| Hs_DNA_Damage_Response_(only_ATM_dependent)_WP710_79974                               | 11        | 7,21E-05           |
| Hs_IL-5_signaling_pathway_WP127_44626                                                 | 6         | 1,18E-04           |
| Hs_Wnt_Signaling_Pathway_and_Pluripotency_WP399_79474                                 | 10        | 1,23E-04           |
| Hs_miR-targeted_genes_in_leukocytes_-_TarBase_WP2003_82960                            | 11        | 1,77E-04           |
| Hs_RNA_Polymerase_I,_RNA_Polymerase_III,_and_Mitochondrial_Transcription_WP1905_83386 | 10        | 3,09E-04           |
| Hs_Insulin_Signaling_WP481_82731                                                      | 12        | 3,78E-04           |
| <b>Hs_MAPK_Cascade_WP422_38880</b>                                                    | <b>5</b>  | <b>4,96E-04</b>    |
| Hs_Cytosolic_sensors_of_pathogen-associated_DNA_WP2794_83421                          | 7         | 5,17E-04           |
| Hs_BDNF_signaling_pathway_WP2380_79953                                                | 11        | 5,61E-04           |
| Hs_Leukocyte_TarBase_WP2003_44886                                                     | 10        | 6,89E-04           |
| Hs_RIG-I-MDA5_mediated_induction_of_IFN-alpha-beta_pathways_WP1904_83061              | 7         | 7,62E-04           |
| Hs_Structural_Pathway_of_Interleukin_1_(IL-1)_WP2637_80029                            | 6         | 8,18E-04           |
| Hs_Nuclear_Receptors_Meta-Pathway_WP2882_83040                                        | 17        | 8,32E-04           |
| Hs_AGE-RAGE_pathway_WP2324_53381                                                      | 7         | 8,36E-04           |
| Hs_SUMOylation_of_DNA_damage_response_and_repair_proteins_WP3327_83291                | 7         | 1,00E-03           |
| Hs_Regulation_of_toll-like_receptor_signaling_pathway_WP1449_45049                    | 10        | 0,001246077        |
| Hs_EGF-EGFR_Signaling_Pathway_WP437_79266                                             | 11        | 0,001474413        |
| Hs_Interferon_type_I_WP585_47017                                                      | 6         | 0,001531327        |
| <b>Hs_MAPK_Signaling_Pathway_WP382_79951</b>                                          | <b>11</b> | <b>0,001967802</b> |
| Hs_O-linked_glycosylation_WP3315_83262                                                | 8         | 0,002035042        |
| Hs_Signaling_by_VEGF_WP1919_83276                                                     | 8         | 0,002035042        |
| Hs_Signaling_by_SCF-KIT_WP2713_83115                                                  | 5         | 0,002227336        |
| <b>Hs_Regulation_of_Actin_Cytoskeleton_WP51_79977</b>                                 | <b>10</b> | <b>0,002591429</b> |
| Hs_IL-6_signaling_pathway_WP364_44627                                                 | 5         | 0,002772101        |
| Hs_Leptin_signaling_pathway_WP2034_44631                                              | 6         | 0,0028723          |
| Hs_Signaling_Pathways_in_Glioblastoma_WP2261_81197                                    | 7         | 0,002969615        |
| Hs_TSH_signaling_pathway_WP2032_44635                                                 | 6         | 0,003953194        |
| Hs_Wnt_Signaling_Pathway_WP428_79854                                                  | 6         | 0,004264917        |
| Hs_Metabolism_of_carbohydrates_WP1848_83255                                           | 9         | 0,005261387        |
| Hs_Parkin-Ubiquitin_Proteasomal_System_pathway_WP2359_53587                           | 6         | 0,005309053        |
| Hs_Integrated_Breast_Cancer_Pathway_WP1984_82941                                      | 10        | 0,005342348        |

|                                                                 |   |             |
|-----------------------------------------------------------------|---|-------------|
| Hs_G_Protein_Signaling_Pathways_WP35_79952                      | 7 | 0,005616032 |
| Hs_Oxidative_Stress_Induced_Senescence_WP3404_83222             | 7 | 0,005616032 |
| Hs_TNF_alpha_Signaling_Pathway_WP231_81070                      | 7 | 0,005616032 |
| Hs_Mitotic_Prophase_WP2654_83248                                | 7 | 0,0059546   |
| Hs_TGF_beta_Signaling_Pathway_WP366_45152                       | 8 | 0,00602505  |
| Hs_IL-1_signaling_pathway_WP195_44621                           | 5 | 0,006455536 |
| Hs_mRNA_Processing_WP411_79980                                  | 8 | 0,008858873 |
| Hs_Processing_of_Capped_Intron-Containing_Pre-mRNA_WP1889_83367 | 9 | 0,008889845 |

441

| <b>KEGG</b>                   | <b>Count</b> | <b>p-value</b>      |
|-------------------------------|--------------|---------------------|
| <b>MAPK signaling pathway</b> | <b>16</b>    | <b>3.3950486E-4</b> |
| Glycolysis / Gluconeogenesis  | 5            | 0.017449163         |
| Pathways in cancer            | 17           | 0.0018220696        |

442

443

**Table S7:** Primer sequences used in ChIP experiment. All primer sets worked under identical quantitative PCR cycling conditions. Some of the primers used in this study are described in previous study: Human  $\beta$ -actin promoter (-204 \_ -59)<sup>13</sup>.

| Gene                                      | Accession |     | Sequences (5'-3')     | Length (bp) | Amplicon (bp) |
|-------------------------------------------|-----------|-----|-----------------------|-------------|---------------|
| Human MAP2K6 Promoter 1 (-594 _ -410)     | NM_002758 | for | CAGACCTTCTCGACAAGCCA  | 20          | 185           |
|                                           |           | rev | CGAGATAACTGGGTGCGACA  | 20          |               |
| Human MAP2K6 Promoter 2 (-437 _ -329)     | NM_002758 | for | GCAATCTTTGTCGCACCCAG  | 20          | 109           |
|                                           |           | rev | GAAGGCCGCTGGGTAATGTA  | 20          |               |
| Human MAP2K6 Promoter 3 (-112 _ +66)      | NM_002758 | for | TTGCATGAAGATTGCACGCC  | 20          | 179           |
|                                           |           | rev | ATGCATGCACAACCCTTTGC  | 20          |               |
| Human MAP2K6 Promoter 4 (+92 _ +200)      | NM_002758 | for | GCCTGGCGAGTGCATTTTAA  | 20          | 109           |
|                                           |           | rev | AAGCCCTGCCTTACAGGAAC  | 20          |               |
| Human MAP2K6 Promoter 5 (+182 _ +297)     | NM_002758 | for | TTCCTGTAAGGCAGGGCTTG  | 20          | 116           |
|                                           |           | rev | CCAACCTGCTCTGTCTCTCC  | 20          |               |
| Human MAP2K6 Promoter 6 (+299 _ +492)     | NM_002758 | for | AGCGTCTAAATGTGCAAGGCT | 21          | 194           |
|                                           |           | rev | ACCGCAACGGTCTATTTCCC  | 20          |               |
| Human MAP2K6 Promoter 7 (+470 _ +615)     | NM_002758 | for | TGGGGGAAATAGACCGTTGC  | 20          | 146           |
|                                           |           | rev | GAGCAAGACTCGTCTGCTTTT | 21          |               |
| Human MAP2K6 Promoter 8 (+707 _ +792)     | NM_002758 | for | GGGGGATGCTTTGCATCTTG  | 20          | 86            |
|                                           |           | rev | AACAGTGCAGTCCCTTCACAC | 21          |               |
| Human MAP2K6 Enhancer 1 (+2459 _ +2614)   | NM_002758 | for | CTCTGGAAGCTGGAAGGACTG | 21          | 156           |
|                                           |           | rev | AACTCAACCCCAGACAGCTAA | 21          |               |
| Human MAP2K6 Enhancer 2 (+3005 _ +3196 )  | NM_002758 | for | GCAGAGTGGTAGGAAAGGTCT | 21          | 192           |
|                                           |           | rev | GTGTCCTGAGATGTACGGGG  | 20b         |               |
| Human MAP2K6 Enhancer 3 (+9052 _ +9214)   | NM_002758 | for | TGTCAACGTGAAAGCCTCCC  | 20          | 163           |
|                                           |           | rev | TCCACGATGTAAGCGACTCT  | 20          |               |
| Human MAP2K6 Enhancer 4 (+15802 _ +15953) | NM_002758 | for | AGGGAGCACGCAGTCTAATG  | 20          | 152           |
|                                           |           | rev | GTGAGTCGCTCTACATCCCC  | 20          |               |
| Human Chromosome 5 (Control)              |           | for | GGAGGTGGGGAAGTCAGGAA  | 20          | 163           |
|                                           |           | rev | GATCATCCGTGGCTTGAGAT  | 20          |               |

450 **Supplemental References**

- 451 1. Vassallo PF, Simoncini S, Ligi I, Chateau A-L, Bachelier R, Robert S, Morere J,  
452 Fernandez S, Guillet B, Marcelli M, Tellier E, Pascal A, Simeoni U, Anfosso F, Magdinier  
453 F, Dignat-George F, Sabatier F. Accelerated senescence of cord blood endothelial  
454 progenitor cells in premature neonates is driven by SIRT1 decreased expression. *Blood*.  
455 2014;123:2116–2126.
- 456 2. Freund A, Patil CK, Campisi J. p38MAPK is a novel DNA damage response-independent  
457 regulator of the senescence-associated secretory phenotype. *EMBO J*. 2011;30:1536–  
458 1548.
- 459 3. Maas SLN, De Vrij J, Broekman MLD. Quantification and size-profiling of extracellular  
460 vesicles using tunable resistive pulse sensing. *J Vis Exp JoVE*. 2014;e51623.
- 461 4. Robert S, Lacroix R, Poncelet P, Harhoury K, Bouriche T, Judicone C, Wischhusen J,  
462 Arnaud L, Dignat-George F. High-sensitivity flow cytometry provides access to  
463 standardized measurement of small-size microparticles--brief report. *Arterioscler Thromb*  
464 *Vasc Biol*. 2012;32:1054–1058.
- 465 5. Simoncini S, Njock M-S, Robert S, Camoin-Jau L, Sampol J, Harlé J-R, Nguyen C,  
466 Dignat-George F, Anfosso F. TRAIL/Apo2L mediates the release of procoagulant  
467 endothelial microparticles induced by thrombin in vitro: a potential mechanism linking  
468 inflammation and coagulation. *Circ Res*. 2009;104:943–951.
- 469 6. Lacroix R, Robert S, Poncelet P, Kasthuri RS, Key NS, Dignat-George F, ISTH SSC  
470 Workshop. Standardization of platelet-derived microparticle enumeration by flow  
471 cytometry with calibrated beads: results of the International Society on Thrombosis and  
472 Haemostasis SSC Collaborative workshop. *J Thromb Haemost JTH*. 2010;8:2571–2574.
- 473 7. Thuny F, Textoris J, Amara AB, Filali AE, Capo C, Habib G, Raoult D, Mege J-L. The  
474 gene expression analysis of blood reveals S100A11 and AQP9 as potential biomarkers  
475 of infective endocarditis. *PloS One*. 2012;7:e31490.
- 476 8. Bolstad BM, Irizarry RA, Astrand M, Speed TP. A comparison of normalization methods  
477 for high density oligonucleotide array data based on variance and bias. *Bioinforma Oxf*  
478 *Engl*. 2003;19:185–193.
- 479 9. Magdinier F, Wolffe AP. Selective association of the methyl-CpG binding protein MBD2  
480 with the silent p14/p16 locus in human neoplasia. *Proc Natl Acad Sci U S A*.  
481 2001;98:4990–4995.
- 482 10. Jaffe EA, Nachman RL, Becker CG, Minick CR. Culture of human endothelial cells  
483 derived from umbilical veins. Identification by morphologic and immunologic criteria. *J*  
484 *Clin Invest*. 1973;52:2745–2756.
- 485 11. Akeson AL, Woods CW. A fluorometric assay for the quantitation of cell adherence to  
486 endothelial cells. *J Immunol Methods*. 1993;163:181–185.
- 487 12. Vaporciyan AA, Jones ML, Ward PA. Rapid analysis of leukocyte-endothelial adhesion. *J*  
488 *Immunol Methods*. 1993;159:93–100.
- 489 13. Zhou S, Chen H-Z, Wan Y-Z, Zhang Q-J, Wei Y-S, Huang S, Liu J-J, Lu Y-B, Zhang Z-Q,  
490 Yang R-F, Zhang R, Cai H, Liu D-P, Liang C-C. Repression of P66Shc expression by  
491 SIRT1 contributes to the prevention of hyperglycemia-induced endothelial dysfunction.  
492 *Circ Res*. 2011;109:639–648.
